# Supplementary material for: Chemoinformatic Screening for the Selection of Potential Senolytic Compounds from Natural Products
Source: Biomolecules. 2021 Mar 22;11(3):467. doi: 10.3390/biom11030467 (PMC8004226; doi:10.3390/biom11030467)
Supplement: Supplementary file 1 [file biomolecules-11-00467-s001.zip › supplementary material.xlsx]

## Sheet: mol desc Senolytics
Name.Compound	Molweight	cLogP	cLogS	H.Acceptors	H.Donors	Total.Surface.Area	Polar.Surface.Area	Druglikeness	Electronegative.Atoms	Rotatable.Bonds	Aromatic.Rings	Aromatic.Atoms	sp3.Atoms	Symmetric.atoms	log.Kp..cm.s.	Lipinski..violations	Target	ID	pubchem ID	MW	logp	Alogp	HBA	HBD	TPSA	AMR	nRB	nAtom	nAcidicGroup	RC	nRigidB	nAromRing	nHB	SAlerts	uwQED	wQED
Dasatinib	488.014	3.6259	-4.701	9	3	361.62	134.75	8.0376	11	7	3	17	10	2	-6.73	0	ABL1	P00519	3062316	487.16	-0.02	-0.371	9	3	130.22	134.28	8	59	0	4	28	3	12	0	0.411	0.479
Navitoclax (ABT-263)	974.628	9.0239	-8.804	11	2	689.89	170.42	-12.761	18	16	4	24	26	15	-5.44	3	BCL2L2	Q92843	24978538	973.3	6.593	5.527	11	2	170.42	269.66	18	120	0	7	53	4	13	2	0.072	0.082
Panobinostat	349.433	2.6014	-4.478	5	4	284.25	77.15	1.0293	5	7	3	15	6	2	-6.31	0	HDAC4	P56524	6918837	349.18	1.533	0.742	3	4	73.39	112.46	8	49	0	3	20	3	7	4	0.427	0.289
Geldanamycin	560.642	2.8712	-3.929	11	3	435.72	163.48	7.0343	11	5	0	0	20	0	-8.31	2	HSP90AA1	P07900	5288382	560.27	1.021	0.816	11	3	163.48	148.82	5	80	0	2	36	0	14	4	0.254	0.265
CHEMBL1939379	385.491	2.1586	-4.426	7	3	294.79	135.3	2.3217	8	0	2	12	8	0	-7.41	0	HSP90AA1	P07900	49784851	385.16	0.172	0.352	7	3	134.24	105.62	0	50	0	3	29	2	10	1	0.61	0.661
BIIB021	318.767	1.5357	-2.902	7	1	236.34	91.74	1.8895	8	3	3	15	5	0	-6.87	0	HSP90AA1	P07900	16736529	318.1	-0.044	-0.653	7	1	87.93	84.86	3	37	0	3	21	3	8	1	0.724	0.78
NMS-E973	454.438	-0.9321	-3.751	11	3	328.35	145.95	4.482	11	5	1	6	12	4	-7.79	1	HSP90AA1	P07900	135566652	454.15	2.108	-0.817	6	3	146.76	119.87	7	55	0	4	29	3	9	2	0.453	0.459
HSP90 Inhibitor 7	323.355	2.2929	-4.378	7	1	254.65	93.7	1.1285	7	4	2	12	4	0	-6.73	0	HSP90AA1	P07900	54592311	323.14	0.821	0.922	7	1	92.64	94.93	4	41	0	3	22	2	8	2	0.823	0.842
HSP90 Inhibitor 6	389.435	0.0221	-2.924	9	3	283.06	144.68	3.7081	10	5	2	12	6	3	-8.13	0	HSP90AA1	P07900
HSP90 Inhibitor 5	274.538	3.4542	-4.708	3	1	185.32	51.8	-1.6419	6	1	2	12	0	0	-5.41	0	HSP90AA1	P07900	17748247	272.96	1.475	1.775	3	1	50.74	69.57	1	22	0	2	16	2	4	1	0.878	0.843
HSP90 Inhibitor 1	316.161	2.9197	-6.268	5	2	199.57	90.71	-3.595	6	1	3	16	0	3	-6.18	0	HSP90AA1	P07900	13373715	315.01	0.659	0.385	5	2	89.12	78.46	1	29	0	3	20	3	7	0	0.743	0.75
HSP90 Inhibitor 3	189.213	0.8977	-2.313	3	1	151.2	38.33	0.64445	3	2	1	6	3	2	-6.08	0	HSP90AA1	P07900	66988252	189.08	0.945	0.463	3	1	38.33	57.38	2	25	0	2	13	1	4	3	0.665	0.538
HSP90 Inhibitor 4	254.119	3.1487	-4.577	3	1	182.16	51.8	-1.7086	5	1	2	12	1	0	-5.68	0	HSP90AA1	P07900	17755581	253.02	1.042	1.589	3	1	50.74	69.57	1	25	0	2	16	2	4	0	0.88	0.854
Alvespimicyn	616.753	2.0968	-3.216	12	4	487.26	169.52	9.0528	12	8	0	0	23	1	-8.61	2	HSP90AA1	P07900	4476321	616.35	1.034	0.688	12	4	169.52	168.52	8	92	0	2	37	0	16	3	0.206	0.24
2-Deoxy-D-glucose	164.156	-2.3363	-0.068	5	4	123.46	97.99	-2.1384	5	5	0	0	9	0	-9.35	0	NUAK2	Q9H093	225612	164.07	-2.561	-2.138	5	4	97.99	36.01	5	23	0	0	5	0	9	1	0.451	0.411
Metformin	129.166	-1.5398	-0.133	5	3	108.64	91.49	1.2053	5	0	0	0	2	2	-7.99	0	DPP4	P27487	4091	129.1	-0.539	-0.869	5	3	91.49	31.09	2	20	0	0	6	0	8	2	0.52	0.443
Rapamycin	914.182	6.5106	-6.713	14	3	716.91	195.43	2.3788	14	6	0	0	46	0	-7.6	2	MTOR	P42345	5284616	913.56	4.321	-1.147	14	3	195.43	237.14	6	144	0	4	62	0	17	4	0.16	0.19
Tofacitinib	312.376	1.1936	-3.59	7	1	246.07	88.91	-1.1539	7	3	2	9	8	0	-7.14	0	CAMK2D	Q13557	9926791	312.17	-0.016	-1.994	7	1	84.09	84.2	4	43	0	3	21	2	8	0	0.762	0.837
Ruxolitinib	306.372	1.6767	-3.921	6	1	244.68	83.18	-5.579	6	4	3	14	7	2	-6.55	0	JAK1	P23458	25126798	306.16	1.819	-2.006	6	1	76.14	84.5	4	41	0	4	22	3	7	0	0.677	0.716
Aspirin	180.159	1.1314	-1.929	4	1	137.37	63.6	-1.6343	4	3	1	6	3	0	-6.55	0	SLC22A18	Q96BI1	2244	180.04	0.67	0.44	4	1	63.6	48	3	21	1	1	10	1	5	2	0.76	0.669
Allatoin	158.117	-2.0783	-1.109	7	4	108.65	113.32	2.9576	7	1	0	0	1	0	-8.81	0	SERPINA7	P05543	204	158.04	-1.169	-1.241	7	4	113.32	28.02	2	17	0	1	9	0	11	1	0.452	0.441
Epigallocatechin gallate	458.374	2.0543	-2.16	11	8	306.59	197.37	-0.32874	11	4	3	18	13	6	-8.27	2	MAPK10	P53779	65064	458.08	2.984	-1.612	11	8	197.37	120.95	4	51	0	4	32	3	19	3	0.158	0.197
Tocotrienol	382.586	9.0198	-5.372	2	1	332.03	29.46	-1.846	2	9	1	6	16	1	-2.8	1	PIK3CG	P48736	9929901	382.29	7.371	5.048	2	1	29.46	126.48	9	66	0	2	20	1	3	1	0.437	0.451
Quercetin	302.237	1.4902	-2.491	7	5	201.94	127.45	-0.082832	7	1	2	12	6	0	-7.05	0	CDK6	Q00534	5280343	302.04	1.834	-1.244	7	5	127.45	83.44	1	32	0	3	23	2	12	2	0.467	0.458
Piperlongumine	317.34	1.7755	-2.393	6	0	252.86	65.07	0.4941	6	5	1	6	8	4	-6.77	0	GSTO1	P78417	637858	317.13	1.368	-0.601	6	0	65.07	90.16	6	42	0	2	18	1	6	1	0.812	0.807
Naringenin	272.255	2.1557	-2.64	5	3	192.58	86.99	-0.22006	5	1	2	12	6	2	-6.17	0	SIRT1	Q96EB6	932	272.07	0.79	-0.154	5	3	86.99	78.53	1	32	0	3	21	2	8	0	0.772	0.753
Apigenin	270.239	2.3357	-2.856	5	3	191.03	86.99	0.28194	5	1	2	12	4	2	-5.8	0	DAPK1	P53355	5280443	270.05	1.138	-0.224	5	3	86.99	80.15	1	30	0	3	21	2	8	1	0.755	0.722
Kaempferol	286.238	1.8359	-2.787	6	4	195.59	107.22	-0.082832	6	1	2	12	5	2	-6.7	0	CYP3A4	P08684	5280863	286.05	1.486	-0.681	6	4	107.22	81.83	1	31	0	3	22	2	10	1	0.629	0.618
Cianidanol	290.27	1.5087	-1.764	6	5	200.03	110.38	0.31525	6	1	2	12	9	0	-7.82	0	PTGS1	P23219	9064	290.08	0.852	-0.936	6	5	110.38	81.07	1	35	0	3	22	2	11	1	0.545	0.524
Genistein	270.239	1.6272	-2.727	5	3	191.03	86.99	-0.093853	5	1	2	12	4	2	-6.05	0	ESR1	P03372	5280961	270.05	1.043	-0.387	5	3	86.99	78.92	1	30	0	3	21	2	8	1	0.751	0.719
Resveratrol	228.246	2.8295	-2.864	3	3	178.57	60.69	-1.6732	3	2	2	12	3	5	-5.47	0	CYP1B1	Q16678	445154	228.08	2.048	1.194	3	3	60.69	74.61	2	29	0	2	16	2	6	1	0.774	0.713
Pterostilbene	256.3	3.3809	-3.492	3	1	210.39	38.69	-1.4702	3	4	2	12	5	6	-5.18	0	CYP1A1	P04798	5281727	256.11	2.69	1.323	3	1	38.69	84.68	4	35	0	2	16	2	4	1	0.904	0.894
Ginsenoside rb1	1109.3	-0.7048	-4.704	23	15	759.47	377.29	-7.0546	23	16	0	0	75	2	-12.87	3	TOP1	P11387	9898279	1108.6	2.673	-4.453	23	15	377.29	263.98	16	169	0	8	68	0	38	2	0.042	0.061
Phloroglucinol	126.111	0.6225	-0.728	3	3	92.31	60.69	-2.2721	3	0	1	6	3	6	-6.96	0	PTGS2	P35354	359	126.03	0.573	-0.286	3	3	60.69	35.77	0	15	0	1	9	1	6	0	0.585	0.5
Oleuropein	540.516	-0.3124	-1.768	13	6	386.34	201.67	-7.1766	13	11	1	6	24	0	-9.92	3	PTPN1	P18031	5281544	540.18	-0.072	-1.593	13	6	201.67	131.67	11	70	0	3	29	1	19	5	0.101	0.103
Oleacein	320.34	1.8521	-2.252	6	2	257.3	100.9	-4.871	6	10	1	6	9	0	-7.47	0	STAT3	P40763	18684078	320.13	1.397	0.348	6	2	100.9	87.72	10	43	0	1	13	1	8	5	0.471	0.303
Espermidine	145.249	-0.8753	-0.717	3	3	138.32	64.07	-5.5	3	7	0	0	10	0	-7.9	0	AKT1	P31749	1102	145.16	-0.654	-2.738	3	3	64.07	39.33	7	29	0	0	2	0	6	1	0.442	0.388
Urolithin A	228.203	2.2981	-3.494	4	2	159.97	66.76	-1.5983	4	0	2	12	3	0	-6.04	0	AKT1	P31749	5488186	228.04	0.947	0.556	4	2	66.76	67.08	0	25	0	3	19	2	6	2	0.733	0.639
Urolithin B	212.204	2.6438	-3.79	3	1	153.62	46.53	-1.5983	3	0	2	12	2	0	-5.69	0	AKT1	P31749	5380406	212.05	1.661	1.119	3	1	46.53	65.48	0	24	0	3	18	2	4	2	0.729	0.636
Urolithin C	244.202	1.9524	-3.198	5	3	166.32	86.99	-1.5983	5	0	2	12	4	0	-6.39	0	AKT1	P31749	60198001	244.04	1.295	-0.007	5	3	86.99	68.69	0	26	0	3	20	2	8	3	0.591	0.407
Urolithin D	260.201	1.6067	-2.902	6	4	172.67	107.22	-1.5983	6	0	2	12	5	0	-6.74	0	AKT1	P31749	5482042	260.03	1.643	-0.57	6	4	107.22	70.29	0	27	0	3	21	2	10	3	0.496	0.403
Curcumin	368.384	2.949	-3.622	6	2	292.5	93.06	-4.7745	6	8	2	12	7	13	-6.28	0	NFKB1	P19838	969516	368.13	1.945	0.522	6	2	93.06	111.7	8	47	0	2	20	2	8	2	0.739	0.698
ABT-737	813.441	4.6024	-8.674	11	2	602.63	164.49	1.5354	14	15	5	30	16	10	-4.84	2	BCL2L1	Q07817	11228183	812.26	5.425	4.127	8	2	161.81	241.7	17	101	0	6	44	5	10	3	0.085	0.072
A-1331852	658.825	5.8151	-8.951	9	2	475.94	141.48	7.0014	10	7	5	26	16	6	-4.99	1	BCL2L1	Q07817	71565985	658.27	5.377	1.702	9	2	135.26	196.01	8	86	1	9	48	5	11	0	0.244	0.275
A-1155463	669.8	5.434	-8.138	9	2	503.94	164.37	-1.8356	12	11	5	26	12	1	-6.98	1	BCL2L1	Q07817	59447577	669.19	2.746	3.397	9	2	157.43	195.36	11	79	1	6	41	5	11	3	0.131	0.129
Fisetin	286.238	1.8359	-2.787	6	4	195.59	107.22	-0.082832	6	1	2	12	5	0	-6.65	0	ABCG2	Q9UNQ0	5281614	286.05	1.915	-0.681	6	4	107.22	81.83	1	31	0	3	22	2	10	2	0.594	0.554
139-08-2	332.593	4.2038	-4.405	1	0	308.56	0	-19.907	1	15	1	6	18	3	-1.98	0	CLCN1	P35523	8755	367.3	8.516	0	0	0	0	0	15	67	0	1	9	1	0	2	0.306	0.417
Ganetespib	364.404	1.6974	-5.377	7	3	266.75	86.6	4.66	7	2	2	9	5	1	-6.86	0	HSP90B1	P14625	135564985	364.15	3.012	0.242	7	3	88.4	108.68	3	47	0	4	27	3	10	1	0.647	0.673
Onalespib	409.528	2.3502	-2.181	6	2	312.97	67.25	8.2758	6	4	2	12	15	3	-6.63	0	HSP90AB1	P08238	11955716	409.24	1.148	0.851	6	2	67.25	125.21	5	61	0	4	28	2	8	0	0.855	0.86
NVP-AUY922	465.548	1.3356	-3.108	8	3	354.93	100.13	5.1625	8	6	1	6	15	5	-7.52	0	CDC37	Q16543	135539077	465.23	2.44	0.672	6	3	103.62	136.67	8	65	0	4	29	3	9	0	0.538	0.521
PU-H71	512.371	2.9005	-5.652	8	2	315.41	125.41	5.4058	10	7	3	15	11	1	-7.13	1	CDC37	Q16543	9549213	512.05	2.256	-1.323	8	2	122.13	121.51	7	49	0	4	24	3	10	2	0.427	0.44
NVP-BEP800	480.419	4.1343	-6.717	7	2	345.03	121.61	5.7468	10	7	3	15	10	2	-5.96	0	DPP4	P27487	25210273	479.09	1.598	0.413	7	2	117.61	125.68	8	54	0	4	26	3	9	0	0.539	0.563
Timosaponin A-III	740.924	1.3117	-5.243	13	7	506.6	196.99	-5.436	13	6	0	0	52	0	-8.48	3	KRAS	P01116	71306914	740.43	4.661	-3.153	13	7	196.99	176.34	6	116	0	8	53	0	20	1	0.109	0.156
Dactolisib	469.547	6.2031	-9.336	6	0	353.25	73.12	-6.8855	6	3	5	26	4	3	-5.45	0	MTOR	P42345	11977753	469.19	1.359	1.482	6	0	72.06	153.53	3	59	0	6	38	5	6	0	0.436	0.429
Loperamide	477.046	4.7197	-3.81	4	1	367.3	43.78	10.356	5	7	3	18	12	13	-5.65	1	OPRM1	P35372	3955	476.22	3.777	2.174	4	1	43.78	147.56	8	67	0	4	29	3	5	0	0.616	576
Niguldipine	609.721	4.6467	-5.516	9	1	468.56	113.69	3.0174	9	12	3	18	16	10	-5.18	1	ADRA1A	P35348	1236	609.28	6.982	3.845	6	1	111.01	182.15	12	84	0	5	37	3	7	5	0.188	0.113
Fluspirilene	475.581	5.5386	-5.842	4	1	361.28	35.58	9.7036	6	7	3	18	11	13	-5.04	1	HTR3A	P46098	3396	475.24	3.366	1.599	4	1	35.58	140.89	7	66	0	5	32	3	5	1	0.632	0.596
Brefeldin A	280.363	2.4455	-2.933	4	2	223.51	66.76	-9.2257	4	0	0	0	14	0	-6.58	0	GALR2	O43603	5287620	280.17	2.363	-0.704	4	2	66.76	72.86	0	44	0	2	21	0	6	3	0.628	0.506
Tunicamycin A	830.922	-0.7982	-3.931	20	11	607.12	306.37	-18.798	20	20	0	0	42	1	-11.21	3	EIF2AK3	Q9NZJ5	11104835	830.42	2.441	-7.525	20	11	306.37	183.4	22	120	0	4	39	0	31	2	0.029	0.037
Tunicamycin B	844.949	-0.3438	-4.201	20	11	620.88	306.37	-18.798	20	21	0	0	43	1	-10.91	3	EIF2AK3	Q9NZJ5	56927836	844.43	3.01	-7.813	20	11	306.37	186.31	23	123	0	4	39	0	31	2	0.026	0.032
Tunicamycin C	816.895	-1.2526	-3.661	20	11	593.36	306.37	-18.798	20	19	0	0	41	1	-11.51	3	EIF2AK3	Q9NZJ5	56927832	816.4	1.872	-7.237	20	11	306.37	180.49	21	117	0	4	39	0	31	2	0.031	0.041
Tunicamycin D	858.976	0.1106	-4.471	20	11	634.64	306.37	-18.798	20	22	0	0	44	1	-10.61	3	EIF2AK3	Q9NZJ5	56927841	858.45	3.579	-8.101	20	11	306.37	189.22	24	126	0	4	39	0	31	2	0	0
MG-132	475.628	3.1698	-4.865	8	3	394.03	113.6	-14.824	8	15	1	6	17	5	-5.77	0	HSP90AA1	P07900	462382	475.3	4.996	1.688	8	3	113.6	130.54	18	75	0	1	16	1	11	2	0.325	0.279
Anisomycin	265.308	0.8795	-1.998	5	2	204.86	67.79	3.2547	5	5	1	6	11	2	-7.28	0	Hsf1	P38532	253602	265.13	0.333	-0.33	5	2	67.79	73.73	5	38	0	2	15	1	7	2	0.816	0.757
Cycloheximide	281.351	0.9427	-2.688	5	2	213.38	83.47	4.1523	5	3	0	0	13	3	-7.63	0	FKBP1A	P62942	6197	281.16	0.758	-1.105	5	2	83.47	71.29	3	43	0	2	18	0	7	1	0.784	0.785
NVP-BSK805	490.556	2.8987	-4.053	7	1	366.66	68.1	3.2402	9	5	4	21	13	7	-7.52	0	DPP4	P27487	46398810	490.23	0.828	0.19	7	1	64.82	140.12	5	64	0	6	36	4	8	1	0.487	0.485
AG-490	294.309	2.0063	-2.994	5	3	235.11	93.35	-1.2995	5	4	2	12	3	2	-6.38	0	EGFR	P00533	5328779	294.1	1.411	0.973	5	3	93.35	90.13	5	36	0	2	18	2	8	3	0.683	0.574
JAK Inhibitor I	309.343	3.5061	-5.132	4	2	226.54	57.78	-4.7948	5	1	3	13	4	2	-5.38	0	JAK1	P23458	5494425	309.13	1.527	0.964	4	2	53.49	90.32	1	39	0	4	25	3	6	1	0.752	0.726
TYK2-IN-2	310.36	0.9202	-4.402	7	3	241.76	97.34	4.9226	7	4	3	15	3	3	-6.69	0	TYK2	P29597	129626433	310.15	0.675	-1.197	7	3	95.11	91.17	4	41	0	3	21	3	10	0	0.625	0.674
o-Vanillin	152.149	1.1772	-1.662	3	1	121.41	46.53	-3.906	3	2	1	6	3	0	-6.26	0	CAPN1	P07384	8991	152.05	1.018	-0.046	3	1	46.53	44.28	2	19	0	1	9	1	4	1	0.738	0.673
Fenofibrate	360.836	4.389	-5.538	4	0	275.89	52.6	-2.3394	5	7	2	12	8	6	-4.83	0	PPARG	P37231	3339	360.11	3.039	2.475	4	0	52.6	105.74	7	46	0	2	19	2	4	3	0.662	0.538
Digoxin	780.945	1.8954	-5.687	14	6	538.71	203.06	3.4159	14	7	0	0	51	0	-10.17	3	ATP1B4	Q9UN42	2724385	780.43	2.174	-3.678	14	6	203.06	184.46	7	119	0	8	55	0	20	3	0.085	0.109
EF24	311.33	3.7321	-4.193	2	1	238.37	29.1	0.70649	4	2	2	12	3	10	-5.81	0	IKBKB	O14920	70674488	347.09	1.82	2.119	2	1	29.1	95.99	2	40	0	3	23	2	3	2	0.793	0.79
ouabain	584.656	-1.4423	-2.72	12	8	383.26	206.6	0.43549	12	4	0	0	37	0	-11.07	3	ATP1A2	P50993	439501	584.28	-0.808	-4.149	12	8	206.6	136.9	4	85	0	6	42	0	20	3	0.09	0.115
k-strophanthin	404.501	0.96	-3.526	6	3	278.55	104.06	-3.8679	6	2	0	0	23	0	-8.31	0	Mylk	P11799	220861	710.35	0.724	-3.669	14	6	210.9	167.42	8	104	0	7	48	0	20	4	0.071	0.082
strophanthidin	710.811	-0.5075	-3.96	14	6	485.14	210.9	-5.6078	14	8	0	0	44	0	-11.31	3	Atp1a4	Q64541	6185	404.22	1.546	-1.306	6	3	104.06	102.27	2	61	0	5	31	0	9	3	0.53	0.456
diphenyleneiodonium	279.096	3.3238	-4.544	0	0	152.55	0	-2.1841	1	0	2	12	0	6	-5.13	1	NOX1	Q9Y5S8	3101	278.97	1.636	1.522	0	0	0	58.13	0	21	0	3	15	2	0	1	0.438	0.692
Azithromycin	748.992	1.6569	-3.094	14	5	562.27	180.08	13.854	14	7	0	0	50	1	-8.01	2	HDAC8	Q9BY41	447043	748.51	1.888	-2.527	14	5	180.08	188.57	7	124	0	3	47	0	19	2	0.138	0.188
Roxithromycin	837.053	2.331	-4.395	17	5	632.46	216.89	7.111	17	13	0	0	54	1	-8.96	2	CRHBP	P24387	6915744	836.52	1.736	-2.635	15	5	216.89	206.95	13	134	0	3	47	0	20	5	0.064	0.064

## Sheet: mol desc NPs
Natural products (NP) dataset
names	pubchem ID	MW	logp	Alogp	HBA	HBD	TPSA	AMR	nRB	nAtom	nAcidicGroup	RC	nRigidB	nAromRing	nHB	SAlerts	uwQDE	wQED
(-)-Epicatechin	72276	290.08	0.852	-0.936	6	5	110.38	81.07	1	35	0	3	22	2	11	1	0.545	0.524
(+)-Syringaresinol	443023	418.16	1.796	-1.703	8	2	95.84	114.32	6	56	0	4	27	2	10	0	0.648	0.724
(15R)-PGE2	5283086	352.22	2.79	-2.041	5	3	94.83	90.42	12	57	1	1	13	0	8	2	0.461	0.402
(Z)-Coniferyl Alcohol	1549094	180.08	0.684	0.165	3	2	49.69	55.58	3	25	0	1	10	1	5	0	0.795	0.748
(Z)-ligustilide	5319022	190.1	2.819	0.811	2	0	26.3	56.71	2	28	0	2	13	0	2	3	0.544	0.463
1,8-Cineol	2758	154.14	2.595	1.311	1	0	9.23	44.03	0	29	0	2	12	0	1	0	0.44	0.524
10-Gingerol	168115	350.25	4.713	-2.749	4	2	66.76	92.45	14	59	0	1	11	1	6	1	0.486	0.431
10-Methoxycanthin-6-one	158928	250.07	0.244	-1.007	4	0	41.9	77.94	1	29	0	4	21	3	4	0	0.661	0.643
11-Dehydrosinulariolide	137628341	332.2	2.607	2.245	4	0	55.9	90.73	0	52	0	3	26	0	4	5	0.471	0.298
11-Oxoaerothionin	466455	827.83	1.435	-1.045	9	4	177.37	160.82	11	65	0	4	33	0	13	1	0.217	0.241
17-O-Acetylacuminolide	380682	392.22	4.684	0.812	6	1	82.06	99.9	4	60	0	4	27	0	7	2	0.762	0.74
22,27-Dinorzyggomphic acid B	46938548	362.22	6.974	4.277	2	1	37.3	119.08	4	57	1	3	25	1	3	2	0.543	0.543
27-Nor-zyggomphic acid	46938443	376.24	7.366	4.724	2	1	37.3	123.36	4	60	1	3	26	1	3	2	0.503	0.503
2'-methoxykobusin	637889	400.15	2.125	-1.275	7	0	64.61	110.59	5	53	0	5	28	2	7	0	0.746	0.776
3,3'-Diindolylmethane	3071	246.12	2.489	0.64	2	2	24.06	86.01	2	33	0	4	20	4	4	0	0.53	0.57
3',4',7-Trimethoxyflavanone	9818297	314.12	1.753	0.04	5	0	53.99	93.64	4	41	0	3	21	2	5	0	0.903	0.904
3-Epimaslinic acid	25564831	472.36	8.24	1.907	4	3	77.76	137.08	1	82	1	5	37	0	7	1	0.625	0.562
3'-Methoxypongapin	15838767	366.07	2.554	-1.471	7	0	72.45	104.11	3	41	0	5	28	3	7	1	0.635	0.663
4-Epi-isoinuviscolide	53320574	248.14	1.628	0.906	3	1	46.53	66.76	0	38	0	3	20	0	4	4	0.557	0.393
4H-tomentosin	15109105	250.16	2.021	0.103	3	1	46.53	68.01	3	40	0	2	16	0	4	4	0.617	0.452
4-hydroxybenzaldehyde	126	122.04	0.349	0.452	2	1	37.3	37.64	1	15	0	1	8	1	3	1	0.647	0.595
2'-methoxykobusin	637889	400.15	2.125	-1.275	7	0	64.61	110.59	5	53	0	5	28	2	7	0	0.746	0.776
3,3'-Diindolylmethane	3071	246.12	2.489	0.64	2	2	24.06	86.01	2	33	0	4	20	4	4	0	0.53	0.57
3',4',7-Trimethoxyflavanone	9818297	314.12	1.753	0.04	5	0	53.99	93.64	4	41	0	3	21	2	5	0	0.903	0.904
3-Epimaslinic acid	25564831	472.36	8.24	1.907	4	3	77.76	137.08	1	82	1	5	37	0	7	1	0.625	0.562
3'-Methoxypongapin	15838767	366.07	2.554	-1.471	7	0	72.45	104.11	3	41	0	5	28	3	7	1	0.635	0.663
4-Epi-isoinuviscolide	53320574	248.14	1.628	0.906	3	1	46.53	66.76	0	38	0	3	20	0	4	4	0.557	0.393
4H-tomentosin	15109105	250.16	2.021	0.103	3	1	46.53	68.01	3	40	0	2	16	0	4	4	0.617	0.452
4-Hydroxycordoin	5879763	324.14	3.191	2.354	4	2	66.76	104.03	6	44	0	2	19	2	6	3	0.728	0.605
4-Methoxy-5-hydroxycanthin-6-one	5320161	266.07	0.803	-1.356	5	1	62.13	79.69	1	30	0	4	22	3	6	1	0.685	0.668
4-O-Methylhonokiol	155160	280.15	4.041	3.02	2	1	29.46	95.08	6	41	0	2	16	2	3	1	0.772	0.758
5-hydroxymethylfurfural	237332	126.03	-0.383	-0.753	3	1	46.53	34.48	2	15	0	1	7	1	4	1	0.685	0.615
5-methoxypsoralen	2355	216.04	1.337	-0.317	4	0	44.76	61.53	1	24	0	3	17	2	4	2	0.711	0.626
6-8-Diprenyleriodictyol	101705716	424.19	4.384	2.646	6	4	107.22	127.41	5	59	0	3	28	2	10	2	0.546	0.506
6-Gingerol	442793	294.18	2.437	-1.597	4	2	66.76	80.8	10	47	0	1	11	1	6	1	0.693	0.643
6-Shogaol	5281794	276.17	3.775	-0.217	3	1	46.53	82.07	9	44	0	1	11	1	4	2	0.756	0.675
7-Deacetylgedunin	3034112	440.22	2.817	0.435	6	1	85.36	117.33	1	64	0	6	36	1	7	3	0.65	0.544
8-Epiasterolide	14448071	232.15	3.355	1.451	2	0	26.3	66.16	0	37	0	3	19	0	2	3	0.535	0.454
8-Epiinuvisolide	13817985	248.14	1.407	0.566	3	1	46.53	65.96	0	38	0	3	20	0	4	4	0.557	0.393
8-Gingerol	168114	322.21	3.575	-2.173	4	2	66.76	86.63	12	53	0	1	11	1	6	1	0.59	0.537
8-methoxypsoralen	4114	216.04	1.337	-0.317	4	0	44.76	61.53	1	24	0	3	17	2	4	2	0.711	0.626
8-Tigloyldesacetylezomontanin	101656883	376.15	1.55	2.091	7	1	91.29	89.95	3	51	0	4	27	0	8	5	0.499	0.359
Acacetin	5480899	446.12	0.153	-2.251	10	5	155.14	117.89	5	54	0	4	30	2	15	1	0.309	0.401
Aciculatin	131704	414.13	0.918	-1.868	8	4	125.68	113.12	3	52	0	4	30	2	12	1	0.489	0.546
Alantolactone	72724	232.15	3.443	1.106	2	0	26.3	65.04	0	37	0	3	19	0	2	4	0.468	0.349
Albaconol	5317148	346.25	6.001	1.913	3	3	60.69	103.23	2	59	0	3	25	1	6	0	0.828	0.798
Albinoside_I	71452845	1114.54	0.79	-9.086	26	10	373.5	239.9	10	163	0	6	72	0	36	2	0.053	0.086
Albinoside_II	71449227	1120.57	3.613	-5.724	24	8	333.04	252.55	10	166	0	6	73	0	32	4	0.043	0.053
Albinoside_IV	71452845	1114.54	0.79	-9.086	26	10	373.5	239.9	10	163	0	6	72	0	36	2	0.053	0.083
Albinoside_IX	132584643	1018.53	4.882	-5.553	21	7	294.35	228.72	15	153	0	5	60	0	28	4	0.036	0.042
Albinoside_VI	132584640	968.48	1.624	-7.839	22	8	314.58	208.87	10	143	0	5	61	0	30	2	0.055	0.085
Albinoside_VII	132584641	952.49	2.327	-7.339	21	7	294.35	207.49	10	142	0	5	60	0	28	2	0.057	0.09
Albinoside_VIII	132584642	990.5	3.744	-4.977	21	7	294.35	222.89	13	147	0	5	60	0	28	3	0.046	0.063
Albinosinic_acid_A	102458570	990.49	-0.097	-10.279	24	13	372.36	209.3	23	146	1	5	49	0	37	1	0.027	0.035
Alnuside B	11684063	462.19	0.297	-1.378	9	6	156.91	123.79	10	63	0	3	25	2	15	1	0.275	0.307
Aloe Emodin	10207	270.05	-0.65	-0.274	5	3	94.83	76.99	1	30	0	3	21	2	8	0	0.76	0.747
Aloifol_II	176096	304.13	2.424	-0.082	5	2	68.15	92.34	6	42	0	2	17	2	7	0	0.901	0.899
Alpinetin	154279	270.09	1.825	0.474	4	1	55.76	81.96	2	34	0	3	20	2	5	0	0.936	0.925
Alpinone	5317747	286.08	1.49	-0.179	5	2	75.99	83.3	2	35	0	3	21	2	7	0	0.898	0.901
Alternaramide	44605719	588.29	3.482	-1.431	10	2	125.12	157.21	5	83	0	5	42	2	12	2	0.409	0.466
Amarisolide	101993223	492.24	2.555	-1.918	9	4	134.91	124.56	6	71	0	5	33	1	13	2	0.358	0.39
Amentoflavone	5281600	538.09	2.03	-0.839	10	6	173.98	157.86	3	58	0	6	42	4	16	1	0.179	0.228
Amestolkolide B	71550882	442.16	-0.367	0.041	8	0	108.5	108.74	0	58	0	6	37	0	8	3	0.472	0.43
Andrographolide	5318517	350.21	2.913	-0.328	5	3	86.99	94	3	55	0	3	24	0	8	4	0.552	0.407
Apigenin	5280443	270.05	1.138	-0.224	5	3	86.99	80.15	1	30	0	3	21	2	8	1	0.755	0.722
Arglanin	12305204	262.12	0.423	0.412	4	1	63.6	68.62	0	37	0	3	21	0	5	3	0.653	0.525
Artemisinin	68827	282.15	3.039	0.801	5	0	53.99	61.35	0	42	0	4	23	0	5	3	0.616	0.498
Arzanol	54682566	402.17	3.499	1.056	7	4	124.29	112.08	6	55	0	2	24	1	11	5	0.381	0.268
Asperimide C	146684424	379.14	0.729	0.976	6	3	95.86	110.26	3	49	0	4	28	2	9	1	0.775	0.779
Asperimide D	146684425	379.14	0.729	0.976	6	3	95.86	110.26	4	49	0	4	27	2	9	1	0.777	0.781
Asperphenamate	173952	506.22	4.521	3.399	6	2	84.5	161.28	14	68	0	4	27	4	8	2	0.252	0.208
Astragalin	5282102	448.1	-0.249	-2.771	11	7	186.37	114.53	4	52	0	4	31	2	18	1	0.2	0.29
Astragaloside IV	13943297	784.46	3.326	-3.367	14	9	228.22	191.17	7	123	0	8	55	0	23	1	0.085	0.131
Atractylenolide II	14448070	232.15	3.355	1.451	2	0	26.3	66.16	0	37	0	3	19	0	2	3	0.535	0.454
Atractylodin	5321047	182.07	3.775	2.37	1	0	9.23	64.32	1	24	0	1	13	1	1	1	0.488	0.592
Atractylon	3080635	216.15	3.691	1.197	1	0	9.23	66.87	0	36	0	3	18	1	1	1	0.52	0.632
Aurantiamide acetate	124319	444.2	3.459	2.202	6	2	84.5	136.97	13	61	0	3	22	3	8	2	0.456	0.388
Auraptene	1550607	298.16	4.074	3.23	3	0	35.53	95.28	6	44	0	2	17	1	3	3	0.576	0.49
Austroinulin	70698052	322.25	5.811	1.215	3	3	60.69	93.88	3	57	0	2	21	0	6	1	0.791	0.755
Avarol	72185	314.22	6.625	2.828	2	2	40.46	98.93	2	53	0	3	23	1	4	2	0.729	0.704
Baicalein	5281605	270.05	2.629	-0.224	5	3	86.99	80.15	1	30	0	3	21	2	8	2	0.713	0.647
Baicalin	64982	446.08	1.051	-2.213	11	6	183.21	112.72	4	50	1	4	31	2	17	2	0.228	0.315
Bakuchiol	5468522	256.18	6.454	3.966	1	1	20.23	89.35	6	43	0	1	13	1	2	1	0.467	0.58
b-amyrin	73145	426.39	11.546	3.012	1	1	20.23	132.32	0	81	0	5	35	0	2	1	0.484	0.571
Barettin	11177588	418.08	1.224	-2.119	8	5	134.63	97.64	5	45	0	3	23	2	13	4	0.295	0.244
Batatasin_III	10466989	244.11	2.155	0.916	3	2	49.69	79.06	4	34	0	2	15	2	5	0	0.903	0.883
b-caryophyllene	5281515	204.19	6.044	3.229	0	0	0	67.69	0	39	0	2	16	0	0	1	0.299	0.462
Benzomalvin_A	10068406	381.15	1.921	1.503	5	0	52.98	122.83	2	48	0	5	31	3	5	0	0.73	0.721
Berberine	2353	336.12	2.473	-2.525	4	0	39.93	98.84	2	43	0	5	27	3	4	1	0.574	0.574
Berenjenol	16681372	456.4	10.152	1.887	2	1	29.46	132.88	2	85	0	6	36	0	3	0	0.771	0.729
Betaine	247	117.08	-1.227	-2.256	2	0	40.13	26.59	2	19	0	0	5	0	2	1	0.479	0.441
Betulin	72326	442.38	9.714	2.141	2	2	40.46	131.81	2	82	0	5	34	0	4	1	0.707	0.691
Betulinic Acid	64971	456.36	9.407	2.35	3	2	57.53	131.75	2	81	1	5	35	0	5	1	0.713	0.664
Bornyl Cinnamate	5371827	284.18	5.441	2.881	2	0	26.3	87.99	4	45	0	3	19	1	2	3	0.598	0.54
Bourjotinolone A	21603611	472.36	6.651	1.618	4	2	66.76	135.76	2	82	0	5	36	0	6	1	0.724	0.669
Bractelactone	11486856	416.13	5.091	1.371	6	2	93.06	127.32	6	51	0	4	28	3	8	5	0.441	0.297
Brazilin	73384	286.08	0.405	-0.484	5	4	90.15	82.07	0	35	0	4	24	2	9	1	0.636	0.586
Brevipolide_K	132850049	402.17	1.864	0.114	7	1	91.29	106.8	8	55	0	3	23	1	8	3	0.624	0.546
Brevipolide_L	132850050	388.15	1.543	0.049	7	2	102.29	101.76	7	52	0	3	23	1	9	3	0.627	0.563
Brevipolides_G	71522010	386.14	0.946	0.121	7	2	110.13	104.08	8	50	0	3	22	1	9	3	0.598	0.539
Brevipolides_H	71521993	400.15	1.267	0.186	7	1	99.13	109.12	9	53	0	3	22	1	8	3	0.595	0.52
b-sitosterol	222284	414.39	11.595	1.3	1	1	20.23	123.88	6	80	0	4	27	0	2	1	0.617	0.742
Butyrolactone I	5235506	424.15	2.67	2.637	7	3	113.29	122.36	7	55	0	3	26	2	10	4	0.434	0.338
Cacospongionolide B	10386285	400.26	6.078	1.613	4	1	55.76	113.1	4	65	0	4	28	0	5	3	0.71	0.589
Caffeic acid	689043	180.04	0.888	0.203	4	3	77.76	50.41	2	21	1	1	11	1	7	2	0.655	0.561
Calein_B	90474242	420.18	2.038	1.326	8	1	116.2	105.73	5	58	0	2	26	0	9	3	0.564	0.551
Calein_C	66551442	420.18	2.038	1.326	8	1	116.2	105.73	5	58	0	2	26	0	9	3	0.564	0.551
Calocedrin	9999082	368.09	1.509	-0.109	7	1	83.45	100.42	3	43	0	5	28	2	8	3	0.723	0.655
Cannabifolin C	101888794	488.35	6.392	0.406	5	3	86.99	133.19	0	83	0	6	40	0	8	2	0.544	0.461
Canophyllal	12302400	440.37	10.533	2.383	2	0	34.14	133.33	1	80	0	5	35	0	2	1	0.634	0.618
Canophyllol	7330581	442.38	10.426	2.127	2	1	37.3	134.32	1	82	0	5	35	0	3	0	0.709	0.707
Canthin-6-one	97176	220.06	0.215	-0.508	3	0	32.67	71.29	0	25	0	4	20	3	3	0	0.603	0.579
Capnoidine	120698	367.11	1.446	-0.177	7	0	66.46	100.13	1	44	0	6	31	2	7	2	0.726	0.698
Carabrone	164879	248.14	2.424	0.429	3	0	43.37	66.19	3	38	0	3	17	0	3	3	0.663	0.545
Cardamonin	641785	270.09	3.045	0.888	4	2	66.76	84.92	4	34	0	2	17	2	6	2	0.864	0.795
Carnosic acid	65126	332.2	5.474	0.592	4	3	77.76	93.98	2	52	1	3	24	1	7	1	0.821	0.785
Carnosol	442009	330.18	5.108	0.628	4	2	66.76	91.58	1	50	0	4	26	1	6	3	0.741	0.609
Carpesiolin	10015663	264.14	0.669	0.207	4	1	63.6	66.41	0	39	0	3	21	0	5	3	0.653	0.526
Caruifolin D	44558928	496.28	2.836	0.374	6	1	82.06	128.32	0	76	0	8	43	0	7	3	0.532	0.424
Carvacrol	10364	150.1	2.487	1.664	1	1	20.23	49.89	1	25	0	1	10	1	2	0	0.559	0.643
Caryophyllene_oxide	1742210	220.18	4.607	1.914	1	0	12.53	64.19	0	40	0	3	18	0	1	2	0.465	0.528
Casticin	5315263	374.1	2.179	-1.549	8	2	103.68	105.2	5	45	0	3	24	2	10	1	0.687	0.78
Celastrol	122724	450.28	7.98	2.483	4	2	74.6	134.33	1	71	1	5	36	0	6	1	0.678	0.631
Chaetomin	73583	710.11	-1.683	0.344	12	3	238.17	189.25	5	77	0	9	50	3	15	2	0.199	0.318
Chalcone	637760	208.09	3.171	2.513	1	0	17.07	75.06	3	28	0	2	14	2	1	2	0.535	0.609
Chelerythrine	2703	348.12	3.075	-2.424	4	0	39.93	104.46	2	44	0	5	28	4	4	2	0.428	0.407
Chlorogenic_acid	1794427	354.1	-0.7	-1.194	9	6	164.75	85.8	5	43	1	2	21	1	15	4	0.267	0.252
Chondroitin sulfate	24766	463.06	-4.457	-4.2	16	8	267.22	83.28	7	51	2	2	24	0	24	1	0.098	0.181
Chrysin	5281607	254.06	1.852	0.339	4	2	66.76	78.55	1	29	0	3	20	2	6	1	0.846	0.801
Chrysogenester	139589899	332.2	3.76	3.104	4	2	66.76	101.9	9	52	0	1	15	1	6	4	0.5	0.355
Chrysophanol	10208	254.06	0.598	0.817	4	2	74.6	75.22	0	29	0	3	21	2	6	0	0.818	0.779
Cichoric acid	5281764	474.08	1.178	-0.091	12	6	208.12	120.05	11	52	2	2	24	2	18	4	0.145	0.162
Citrinin	54680783	250.08	1.62	-0.345	5	2	83.83	64.44	1	32	1	2	18	0	7	2	0.707	0.65
Citrinin H1	44567621	250.08	1.62	-0.345	5	2	83.83	64.44	1	32	1	2	18	0	7	2	0.576	0.457
Clavatol	3083634	180.08	1.24	0.72	3	2	57.53	52.28	1	25	0	1	12	1	5	1	0.745	0.673
Clearanol_C	101540450	234.09	1.375	0.7	4	1	55.76	65.35	1	31	0	2	17	1	5	3	0.709	0.572
Clearanol_F	38355177	268.09	-0.086	-0.499	6	3	96.22	68.61	2	35	0	2	18	1	9	2	0.697	0.661
Clearanol_G	139586700	266.08	-0.353	-0.83	6	3	96.22	69.19	2	33	0	2	18	1	9	3	0.612	0.524
Colchicine	6167	399.17	1.575	-1.241	7	1	83.09	112.92	6	54	0	3	25	1	8	1	0.748	0.779
Collinin	5316012	328.17	4.314	2.732	4	0	44.76	101.92	7	48	0	2	18	1	4	3	0.633	0.522
Comaparvin	324099	300.1	2.15	-0.911	5	2	75.99	86.84	3	38	0	3	21	1	7	1	0.867	0.864
Conacytone	13970369	362.17	0.893	-1.286	6	3	104.06	93.2	1	52	0	4	28	0	9	3	0.533	0.46
Confusarin	11983285	300.1	2.181	-0.13	5	2	68.15	90.49	3	38	0	3	21	3	7	1	0.775	0.769
Cordycepin	6303	251.1	-2.195	-3.23	8	3	116.03	59.86	2	31	0	3	18	2	11	0	0.461	0.536
Corosolic acid	6918774	472.36	8.142	1.261	4	3	77.76	135.31	1	82	1	5	37	0	7	1	0.636	571
Corymbiferone	136870383	274.05	0.827	-0.964	6	1	82.06	71.72	2	30	0	3	20	0	7	2	0.733	0.708
Corymbiferone_C	102583472	272.07	1.228	0.023	5	0	61.83	75.09	2	32	0	3	20	1	5	3	0.71	0.587
Costunolide	5281437	232.15	3.308	2.529	2	0	26.3	69.26	0	37	0	2	18	0	2	4	0.435	0.326
Coumurrayin	176911	274.12	2.914	1.716	4	0	44.76	82.52	4	38	0	2	17	1	4	3	0.725	0.603
Cryptotanshinone	160254	296.14	3.114	0.661	3	0	43.37	86.33	0	42	0	4	25	1	3	2	0.746	0.667
Cucurbitacin B	5281316	558.32	2.725	0.771	8	3	138.2	151.17	6	86	0	4	37	0	11	4	0.328	0.226
Cucurbitacin E	5281319	556.3	3.404	1.167	8	3	138.2	152.7	6	84	0	4	37	0	11	5	0.292	0.212
Cucurbitacin R	180535	518.32	2.14	0.321	7	4	132.13	140.78	5	83	0	4	35	0	11	1	0.292	0.212
Cudraflavone B	5319925	420.16	3.845	1.83	6	3	96.22	127.68	3	55	0	4	31	2	9	2	0.688	0.646
Curcumin	969516	368.13	1.945	0.522	6	2	93.06	111.7	8	47	0	2	20	2	8	2	0.739	0.689
Curindolizine	132560130	469.27	3.915	0.886	5	1	39.18	150.73	2	70	0	7	39	3	6	0	0.681	0.668
Cyclobalanone	101306798	452.4	12.275	4.186	1	0	17.07	139.46	5	85	0	5	32	0	1	1	0.362	0.443
Cyclolaudenol	101729	440.4	12.47	3.029	1	1	20.23	132.94	5	84	0	5	31	0	2	1	0.521	0.629
Cyclolaudenone	21592246	438.39	11.863	3.598	1	0	17.07	133.96	5	82	0	5	31	0	1	1	0.422	0.515
Cyclolaudenyl_Acetate	14312790	482.41	13.21	3.408	2	0	26.3	142.09	7	89	0	5	32	0	2	3	0.4	0.338
Cyclolinteinone	6444308	384.27	5.65	3.659	3	0	43.37	118.67	9	64	0	2	20	0	3	3	0.435	0.351
Cynandione A	10063465	302.08	1.51	-0.736	6	4	115.06	84.99	3	36	0	2	20	2	10	2	0.621	0.6
Cynaropicrin	119093	346.14	-0.222	0.748	6	2	93.06	87.59	4	47	0	3	23	0	8	4	0.597	0.464
Cystodione G	127051072	458.27	2.275	2.297	6	4	115.06	135.76	12	71	0	1	21	1	10	3	0.369	0.282
Cystodione H	127051073	442.27	3.433	2.898	5	3	94.83	134.51	12	70	0	1	20	1	8	3	0.416	0.314
Cystodione I	127051074	474.3	2.879	2.125	6	3	104.06	139.82	14	76	0	1	20	1	9	2	0.431	0.356
Cystodione M	132594964	488.28	1.41	1.789	7	4	124.29	141.89	13	75	0	1	22	1	11	2	0.366	0.318
Cystone C	127051027	458.3	3.993	3.036	5	3	86.99	140.03	13	75	0	1	20	1	8	2	0.427	0.347
Davallialactone	385642983	446.98	2.107	-0.308	9	0	52.6	131.79	4	37	0	4	33	2	9	4	0.481	0.403
Deacetylkellerin	7091630	400.22	3.488	0.66	5	2	75.99	112.83	3	61	0	4	29	1	7	2	0.816	0.756
Decursin	442126	328.13	2.675	2.199	5	0	61.83	93.68	3	44	0	3	23	1	5	4	0.626	0.463
Deguelin	107935	394.14	2.341	0.035	6	0	63.22	115.54	2	51	0	5	31	2	6	0	0.827	0.827
Dehydrocostus_lactone	73174	230.13	2.451	1.656	2	0	26.3	65.05	0	35	0	3	19	0	2	4	0.462	0.344
Demethoxycurcumin	5469424	338.12	1.916	1.02	5	2	83.83	105.05	7	43	0	2	19	2	7	2	0.808	0.751
Denbinobin	10423984	284.07	0.978	-0.17	5	1	72.83	82.54	2	33	0	3	21	2	6	1	0.906	0.896
Derrivanone	102360079	454.16	2.868	0.571	8	0	97.36	124.08	6	59	0	4	30	2	8	2	0.619	0.624
Des-O-methyllasiodiplodin	14562695	278.15	3.972	-1.87	4	2	66.76	69.65	0	42	0	2	21	1	6	2	0.669	0.601
Diadzein	5281708	254.06	1.124	0.176	4	2	66.76	77.32	1	29	0	3	20	2	6	1	0.844	0.8
Dichotomide Iii	50906291	337.11	1.058	-1.063	7	2	96.86	96.65	6	40	0	3	21	3	9	4	0.483	0.389
Dichotomide X	50993700	421.16	2.204	0.455	8	2	106.09	121.8	9	54	0	3	24	3	10	3	0.456	0.417
Dieckol	3008868	742.08	4.768	-5.108	18	11	287.14	205.32	6	76	0	8	55	6	29	0	0.042	0.074
Dihydroergolide	57403344	308.16	1.591	0.369	5	0	69.67	75.99	2	46	0	3	22	0	5	2	0.76	0.704
Dihydromyricetin	161557	320.05	1.151	-1.932	8	6	147.68	83.08	1	35	0	3	24	2	14	1	0.364	0.409
Dihydrosporogen_AO-1	14378703	250.16	-0.072	0.095	3	2	52.99	67.21	1	40	0	3	19	0	5	2	0.734	0.658
Dihydrotanshinone I	11425923	278.09	2.36	1.292	3	0	43.37	84.98	0	35	0	4	24	2	3	2	0.744	0.662
Diligustilide	70698035	380.2	5.343	-0.101	4	0	52.6	105.96	4	56	0	5	28	0	4	3	0.679	0.56
Dillapiole	10231	222.09	2.74	0.043	4	0	36.92	64.05	4	30	0	2	13	1	4	1	0.789	0.761
Dioscin	119245	868.48	2.836	-3.964	16	8	235.68	208.67	7	133	0	9	62	0	24	1	0.077	0.122
Diosmetin	5281612	300.06	1.378	-0.723	6	3	96.22	86.8	2	34	0	3	22	2	9	1	0.755	0.762
Discretamine	22955	327.15	1.004	0.205	5	2	62.16	98.57	2	45	0	4	25	2	7	0	0.921	0.923
Dolineone	5316959	336.06	1.47	-1.28	6	0	63.22	93.86	0	37	0	6	30	3	6	0	0.63	0.626
Dopamine	681	153.08	0.318	-0.401	3	3	66.48	46.33	2	22	0	1	9	1	6	1	0.656	0.577
DTB	445027	214.13	0.82	-2.034	5	3	78.43	46.05	6	33	1	1	9	0	8	1	0.569	0.535
Echinatin	6442675	270.09	1.35	0.888	4	2	66.76	84.92	4	34	0	2	17	2	6	2	0.864	0.795
Ellagic acid	5281855	302.01	1.366	-1.304	8	4	133.52	74.69	0	28	0	4	25	2	12	3	0.416	0.398
Embelin	3218	294.18	6.234	-3.499	4	2	74.6	70.21	10	47	0	1	11	0	6	3	0.403	0.327
Emodin	3220	270.05	0.517	0.254	5	3	94.83	76.82	0	30	0	3	22	2	8	0	0.73	0.705
Ephemeranthol_B	14777891	272.1	1.938	0.026	4	2	58.92	83.26	2	36	0	3	20	2	6	0	0.909	0.893
Ephemeranthoquinone	10038025	256.07	0.524	-0.015	4	1	63.6	75.31	1	31	0	3	20	1	5	2	0.811	0.733
Epicacalone	21635815	246.13	1.454	-0.265	3	1	46.53	68.48	0	36	0	3	20	1	4	0	0.811	0.775
Epifriedelinol	119242	428.4	13.026	2.486	1	1	20.23	130.7	0	83	0	5	35	0	2	0	0.538	0.642
Epineoadenostylone	14190085	328.17	3.467	2.202	4	0	52.6	93.92	3	48	0	3	23	1	4	3	0.726	0.605
Epitaondiol	156834	412.3	6.523	2.221	3	2	49.69	122.32	0	70	0	5	34	1	5	0	0.764	0.721
Epi-ursolic_acid	14136878	472.36	8.251	0.393	4	3	77.76	134.03	2	82	1	5	36	0	7	1	0.659	0.599
Epoxomicin	11226684	554.37	1.815	-3.145	11	4	157.44	139.16	20	89	0	1	19	0	15	1	0.117	0.129
Epoxyazadiradione	49863985	466.24	3.008	0.548	6	0	82.2	125.76	3	68	0	6	36	1	6	3	0.623	0.514
Ergolide	185786	306.15	1.409	0.586	5	0	69.67	75.56	2	44	0	3	22	0	5	3	0.623	0.514
Ergone	6441416	392.31	8.963	2.866	1	0	17.07	125.87	4	69	0	4	28	0	1	1	0.533	0.661
Ergosta-7,22-dien-3-ol	125947	398.35	10.692	1.933	1	1	20.23	122.21	4	75	0	4	28	0	2	1	0.641	0.785
Ergosterol	444679	396.34	9.499	2.256	1	1	20.23	124.06	4	73	0	4	28	0	2	1	0.628	0.771
Erianthridin	10401022	272.1	1.938	0.026	4	2	58.92	83.26	2	36	0	3	20	2	6	0	0.909	0.893
Erinacerin B	11515478	332.16	2.098	2.019	5	2	75.99	96.83	6	48	0	2	19	1	7	3	0.726	0.612
Escin	3084345	1123.53	1.821	0	23	11	356.81	0	16	162	1	9	69	0	34	5	0.049	0.048
Ethyl Caffeate	5317238	208.07	1.632	0.704	4	2	66.76	59.47	4	27	0	1	11	1	6	4	0.61	0.431
Eugenol	3314	164.08	2.223	1.175	2	1	29.46	52.89	3	24	0	1	9	1	3	1	0.72	0.71
Eupalitin	5748611	330.07	2.047	-1.115	7	3	105.45	93.51	3	38	0	3	23	2	10	1	0.712	0.762
Eupatilin	5273755	344.09	1.939	-1.157	7	2	94.45	98.48	4	41	0	3	23	2	9	1	0.792	0.852
Euscaphic Acid	471426	488.35	5.966	0.822	5	4	97.99	137.37	1	83	1	5	38	0	9	1	0.53	0.474
Excavatolide B	101945830	594.27	2.344	-0.615	12	1	164.26	138.61	10	84	0	4	35	0	13	4	0.215	0.226
Falcarindiol	5281148	260.18	4.573	0.202	2	2	40.46	74.43	8	43	0	0	10	0	4	3	0.611	0.509
Farnesiferol B	1779468	382.21	3.923	2.233	4	1	55.76	115.25	6	58	0	3	24	1	5	3	0.725	0.599
Farnesiferol C	15559239	382.21	4.319	2.471	4	0	44.76	112.79	6	58	0	4	25	1	4	3	0.656	0.54
Ferukrin	11875840	400.22	3.488	0.66	5	2	75.99	112.83	3	61	0	4	29	1	7	2	0.816	0.756
Ferulic_acid	445858	194.06	0.78	0.267	4	2	66.76	55.45	3	24	1	1	11	1	6	1	0.802	0.748
Fimbriol_A	11335575	300.1	1.97	-0.13	5	2	68.15	90.49	3	38	0	3	21	3	7	1	0.775	0.769
Fisetin	5281614	286.05	1.915	-0.681	6	4	107.22	81.83	1	31	0	3	22	2	10	2	0.594	0.554
Fissilandione	100927180	337.1	1.454	-0.499	6	0	65.07	96.59	1	40	0	5	28	1	6	1	0.795	0.784
Flavone	10680	222.07	2.225	1.465	2	0	26.3	75.34	1	27	0	3	18	2	2	1	0.708	0.709
Flavoroseoside	132850138	342.1	-0.375	-2.285	9	5	145.91	80.52	3	42	0	3	23	1	14	3	0.32	0.339
Fraxinellone	124039	232.11	1.993	0.23	3	0	35.53	63.35	1	33	0	3	18	1	3	2	0.717	0.648
Friedelin	91472	426.39	12.613	3.217	1	0	17.07	132.54	0	81	0	5	35	0	1	0	0.435	0.524
Fucoidan	92023653	242.05	-1.725	-1.733	7	3	121.67	47.8	2	29	1	1	13	0	10	1	0.549	0.593
Fucoxanthin	5281239	658.42	9.874	6.631	6	2	96.36	202.15	12	106	0	3	38	0	8	6	0.147	0.081
Fumiquinone_B	136773313	184.04	0.889	-0.77	5	2	83.83	45.47	1	21	0	1	12	0	7	2	0.621	0.55
Fumonisin_B1	2733487	721.39	1.731	-4.605	16	8	288.51	161.81	31	109	4	0	18	0	24	3	0.01	0.01
Furanodiene	636458	216.15	3.43	2.853	1	0	9.23	71.92	0	36	0	2	17	1	1	1	0.459	0.563
Furanodienone	6506548	230.13	2.44	2.162	2	0	26.3	72.43	0	35	0	2	18	1	2	1	0.654	0.649
Fuscol	10891538	288.25	6.255	3.593	1	1	20.23	94.72	5	53	0	1	16	0	2	2	0.474	0.566
Fuscoside B	56669207	420.29	5.39	2.357	5	3	79.15	121.17	7	70	0	2	24	0	8	2	0.603	0.534
Fuscoside E	53484199	464.31	6.227	1.758	6	2	85.22	124.42	7	77	0	3	28	0	8	3	0.561	0.46
Galangin	5281616	270.05	2.2	-0.117	5	3	86.99	80.23	1	30	0	3	21	2	8	1	0.757	0.724
Galangin_5-methylether	5488105	284.07	2.521	-0.053	5	2	75.99	85.27	2	33	0	3	21	2	7	1	0.882	0.869
Galbanic acid	7082474	398.21	4.344	2.446	5	1	72.83	116.12	6	59	1	3	25	1	6	3	0.686	0.572
Gallic acid	370	170.02	0.964	-0.721	5	4	97.99	41.77	1	18	1	1	11	1	9	1	0.544	0.485
Galphimine_A	21578020	532.3	3.803	-0.182	8	4	133.52	142.57	3	82	0	5	39	0	12	3	0.359	0.326
Galphimine_B	127671	516.31	3.975	0.391	7	3	113.29	141.48	3	81	0	5	38	0	10	3	0.465	0.399
Galphimine_C	21578026	516.31	3.934	-0.127	7	3	113.29	141.7	3	81	0	5	38	0	10	3	0.462	0.396
Galphimine_D	21578021	574.31	4.114	0.197	9	3	139.59	151.73	5	87	0	5	40	0	12	3	0.35	0.344
Galphimine_E	21578019	574.31	4.114	0.197	9	3	139.59	151.73	5	87	0	5	40	0	12	3	0.35	0.344
Galphimine_F	21578022	516.31	4.02	-0.208	7	3	113.29	140.78	3	81	0	5	38	0	10	3	0.461	0.396
Galphimine_G	21578023	574.31	3.73	-0.402	9	3	139.59	151.03	5	87	0	5	40	0	12	3	0.346	0.34
Galphimine_H	21578024	532.3	3.848	-0.781	8	4	133.52	141.88	3	82	0	5	39	0	12	3	0.35	0.319
Galphimine_I	21578025	574.31	4.159	-0.402	9	3	139.59	151.03	5	87	0	5	40	0	12	3	0.346	0.34
Gambogic acid	9852185	628.3	4.883	3.582	8	2	119.36	180.77	8	90	1	6	43	1	10	2	0.337	0.326
Garcinol	5281560	602.36	10.149	5.473	6	3	111.9	182.89	10	94	0	3	36	1	9	6	0.162	0.093
Gedunin	12004512	482.23	3.557	0.815	7	0	91.43	126.48	3	69	0	6	37	1	7	3	0.579	0.495
Geleganimine B	102131191	696.32	0.476	-1.953	6	1	125.67	187.13	6	95	0	11	55	2	7	1	0.462	0.441
Genkwanin	5281617	284.07	1.459	-0.16	5	2	75.99	85.19	2	33	0	3	21	2	7	1	0.88	0.867
Geranin_A	4023574	544.14	0.366	-1.103	10	7	169.3	154.86	2	64	0	7	44	4	17	0	0.163	0.203
Gibberellic acid	6466	346.14	-0.595	-0.011	6	3	104.06	85.87	1	47	1	5	28	0	9	3	0.575	0.469
Gigantol	3085362	274.12	2.184	0.417	4	2	58.92	85.7	5	38	0	2	16	2	6	0	0.924	0.91
Girinimbine	96943	263.13	3.081	1.813	2	1	21.26	89.52	0	37	0	4	23	3	3	0	0.635	0.679
Glabrachromene I	15719487	380.13	3.351	0.52	6	1	74.22	113.25	4	48	0	4	27	2	7	2	0.846	0.813
Glaucine	16754	355.18	1.757	0.229	5	0	40.16	108.41	4	51	0	4	25	2	5	0	0.879	0.892
Gleinene	15609901	274.12	3.427	0.879	4	0	44.76	82.25	4	38	0	2	17	1	4	2	0.818	0.754
Gliotoxin	6223	326.04	-2.142	-0.153	6	2	131.68	81.69	1	35	0	4	23	0	8	2	0.662	0.688
Glycycoumarin	5317756	368.13	3.001	1.644	6	3	96.22	109.29	4	47	0	3	25	2	9	3	0.658	0.568
Glycyrrhizic Acid	14982	822.4	4.414	-1.606	16	8	267.04	198.84	7	120	3	7	57	0	24	1	0.106	0.107
Gnaphaliin_B	5491798	314.08	2.761	-0.552	6	2	85.22	91.91	3	37	0	3	22	2	8	1	0.868	0.891
Goniothalamin	6440856	200.08	2.859	2.151	2	0	26.3	64.44	2	27	0	2	14	1	2	2	0.641	0.61
Goreishic acid	3081756	470.34	7.98	1.848	4	3	77.76	136.43	1	80	1	5	37	0	7	0	0.641	0.587
Granilin	442254	264.14	0.41	-0.467	4	2	66.76	66.82	0	39	0	3	21	0	6	4	0.545	0.384
Grayanotoxin XVIII	44559345	336.23	1.983	-0.016	4	4	80.92	90.45	0	56	0	4	27	0	8	1	0.617	0.559
Guangsangon I	11239003	624.16	3.213	-0.051	11	8	205.21	182.18	5	74	0	6	46	4	19	3	0.104	0.122
Gummosin	7092581	382.21	4.11	1.557	4	1	55.76	112.34	3	58	0	4	28	1	5	3	0.774	0.645
Guttiferone E	5352088	382.21	4.11	1.557	4	1	55.76	112.34	3	58	0	4	28	1	5	3	0.162	0.093
Gymnopusin	14505894	300.1	1.97	-0.13	5	2	68.15	90.49	3	38	0	3	21	3	7	1	0.775	0.769
Gyrophoric_acid	135728	468.11	3.566	1.395	10	5	170.82	126.93	7	54	1	3	29	3	15	2	0.265	0.328
Halipeptin A	10438962	626.37	2.981	-1.736	11	3	171.93	156.9	10	97	0	2	34	0	14	3	0.196	0.222
Harmine	5280953	212.09	1.169	-1.037	3	1	33.62	69.05	1	28	0	3	17	3	4	0	0.649	0.64
Harpagoside	5281542	494.18	0.626	-1.956	11	6	175.37	121.73	7	65	0	4	31	1	17	4	0.164	0.167
Hautriwaic Acid	12310372	332.2	4.029	-0.013	4	2	66.76	94.12	5	52	1	3	21	1	6	0	0.927	0.921
Heliangin	70697714	362.17	1.814	1.598	6	1	85.36	92.42	3	52	0	3	25	0	7	5	0.541	0.374
Hematein	135403802	300.06	0.38	-1.049	6	4	107.22	82.4	0	34	0	4	25	1	10	2	0.55	0.506
Hematoxylin	442514	302.08	0.753	-1.047	6	5	110.38	83.68	0	36	0	4	25	2	11	1	0.517	0.49
Heptacosan-4-olide	10982443	408.4	12.986	-6.679	2	0	26.3	87.1	22	81	0	1	7	0	2	3	0.157	0.111
Herbarumin_I	10751829	228.14	1.726	-1.217	4	2	66.76	55.57	2	36	0	1	14	0	6	3	0.62	0.504
Herbarumin_II	101048043	244.13	1.18	-1.87	5	3	86.99	56.91	2	37	0	1	15	0	8	3	0.519	0.429
Herbarumin_III	643678	212.14	2.327	-0.995	3	1	46.53	52.52	2	35	0	1	13	0	4	3	0.628	0.51
Hericenone E	131752559	594.39	10.389	1.23	6	1	89.9	170.27	24	97	0	1	19	1	7	6	0	0
Herniarin	10748	176.05	1.051	0.532	3	0	35.53	52.24	1	21	0	2	13	1	3	2	0.651	0.567
Hesperetin	72281	302.08	1.03	-0.653	6	3	96.22	85.17	2	36	0	3	22	2	9	0	0.773	0.795
Hexacosan-4-olide	10992904	394.38	12.417	-6.391	2	0	26.3	84.19	21	78	0	1	7	0	2	3	0.173	0.126
Hinokitiol	3611	164.08	2.349	0.847	2	1	37.3	50.88	1	24	0	1	11	0	3	1	0.665	0.621
Hirsutine	3037884	368.21	2.648	-0.203	5	1	50.8	108.24	5	55	0	4	25	2	6	4	0.669	0.498
Hofmeisterin	11148458	208.07	1.265	0.544	4	1	63.6	57.25	4	27	0	1	11	1	5	3	0.719	0.582
Hofmeisterin_II	14107494	298.12	2.574	1.724	4	2	74.6	91.04	5	40	0	2	18	2	6	1	0.908	0.888
Honaucin A	54759250	204.02	0.771	0.931	4	0	52.6	45.81	4	22	0	1	9	0	4	4	0.544	0.382
Honaucin B	71744718	250.06	0.695	0.823	5	1	72.83	58.37	9	31	0	0	6	0	6	4	0.536	0.379
Honaucin C	71744755	236.05	0.272	0.573	5	1	72.83	54.08	8	28	0	0	6	0	6	4	0.546	0.388
Honokiol	72303	266.13	3.72	2.956	2	2	40.46	90.05	5	38	0	2	16	2	4	1	0.745	0.755
Humilinolide_C	10461386	610.28	3.162	1.722	10	0	131.5	159.31	9	86	0	5	39	1	10	4	0.278	0.239
Humulin_B	101896409	544.23	1.43	-0.57	10	1	137.96	133.06	6	75	0	6	38	1	11	3	0.397	0.428
Hyperforin	441298	536.39	9.021	6.447	4	1	71.44	166.85	11	91	0	2	29	0	5	3	0.268	0.2
Hyperoside	5281643	464.1	0.099	-3.334	12	8	206.6	116.14	4	53	0	4	32	2	20	2	0.144	0.216
Icariin	5318997	676.24	1.092	-2.616	15	8	234.29	174.53	9	88	0	5	43	2	23	2	0.095	0.139
Icetexone	46187189	342.15	1.704	0.415	5	1	80.67	91.34	1	47	0	4	27	0	6	5	0.536	0.356
Incensole Acetate	53386731	348.27	5.316	2.651	3	0	35.53	101.4	3	61	0	2	23	0	3	3	0.623	0.532
Indole-3-carbinol	3712	147.07	0.996	-0.357	2	2	32.26	47.98	1	20	0	2	11	2	4	0	0.659	0.633
Indole-3-carboxaldehyde	10256	145.05	1.466	-0.101	2	1	29.1	47	1	18	0	2	11	2	3	1	0.658	0.63
Inuviscolide	176489	248.14	1.407	0.566	3	1	46.53	65.96	0	38	0	3	20	0	4	4	0.557	0.393
Isobavachalcone	5281255	324.14	3.292	2.505	4	3	77.76	103.51	5	44	0	2	20	2	7	3	0.662	0.545
Isocordoin	6251270	308.14	4.428	3.068	3	2	57.53	101.91	5	43	0	2	19	2	5	3	0.665	0.557
Isocyperol	14076604	220.18	4.16	1.145	1	1	20.23	65.98	1	40	0	2	16	0	2	1	0.589	0.697
Isoespintanol	44423029	210.13	2.545	0.667	3	1	38.69	63.18	3	33	0	1	12	1	4	0	0.85	0.835
Isogarcinol	11135781	602.36	8.922	4.875	6	2	100.9	181.57	8	94	0	4	39	1	8	6	0.203	0.119
Isoglabrachromene	42608067	380.13	2.764	0.106	6	0	63.22	110.3	2	48	0	5	30	2	6	0	0.84	0.844
Isoimperatorin	68081	270.09	2.538	1.148	4	0	44.76	80.65	3	34	0	3	19	2	4	3	0.735	0.61
Isoliquiritigenin	638278	256.07	1.669	0.824	4	3	77.76	79.88	3	31	0	2	17	2	7	2	0.768	0.691
Isoparvifuran	617473	254.09	3.122	1.018	3	1	38.69	82.83	2	33	0	3	19	3	4	0	0.767	0.77
Isopetasol	11746594	234.16	1.35	1.388	2	1	37.3	68.25	0	39	0	2	18	0	3	1	0.704	0.686
Isophysalin A	57387832	526.18	-0.123	-0.821	10	3	156.66	127.23	0	68	0	7	44	0	13	3	0.292	0.318
Isoquercetin	5280804	464.1	0.099	-3.334	12	8	206.6	116.14	4	53	0	4	32	2	20	2	0.144	0.216
Isorhamnetin	5281654	316.06	1.726	-1.179	7	4	116.45	88.48	2	35	0	3	23	2	11	1	0.602	0.634
Isosclerone	13369486	178.06	-0.245	-0.579	3	2	57.53	48.89	0	23	0	2	14	1	5	0	0.701	0.635
Isoscopoletin	69894	192.04	0.97	-0.031	4	1	55.76	53.85	1	22	0	2	14	1	5	2	0.73	0.638
Isovitexin	162350	432.11	-0.707	-2.655	10	7	177.14	112.51	3	51	0	4	31	2	17	1	0.229	0.307
Jaceosidin	5379096	330.07	1.618	-1.221	7	3	105.45	93.44	3	38	0	3	23	2	10	1	0.705	0.755
Jatamansin	668081	328.13	2.794	2.103	5	0	61.83	93.98	3	44	0	3	23	1	5	4	0.631	0.466
Juglanin	5318717	418.09	-0.006	-2.261	10	6	166.14	108.57	4	48	0	4	29	2	16	1	0.281	0.373
Juglone	3806	174.03	-0.011	0.176	3	1	54.37	50.98	0	19	0	2	14	1	4	0	0.728	0.662
Kaempferide	5281666	300.06	1.807	-0.616	6	3	96.22	86.87	2	34	0	3	22	2	9	1	0.759	0.766
Kaempferitrin	5486199	578.16	-0.149	-3.862	14	8	225.06	144.48	5	71	0	5	40	2	22	1	0.759	0.766
Kaempferol	5280863	286.05	1.486	-0.681	6	4	107.22	81.83	1	31	0	3	22	2	10	1	0.629	0.618
Kalopanaxsaponin A	73296	750.46	6.221	-1.444	12	7	195.6	193.29	6	119	1	7	53	0	19	2	0.139	0.179
Karatavicinol	44386968	400.22	3.547	1.986	5	2	75.99	119.85	10	61	0	2	20	1	7	3	0.6	0.474
Kellerin	40580807	442.24	4.228	1.039	6	1	82.06	121.98	5	66	0	4	30	1	7	3	0.682	0.576
Kobusin	182278	370.14	1.885	-0.776	6	0	55.38	103.95	4	49	0	5	27	2	6	0	0.84	0.855
Labdane F2	3080960	290.26	7.48	2.601	1	1	20.23	89.64	4	55	0	2	18	0	2	1	0.626	0.78
Lanceolatin B	10978265	262.06	2.3	0.615	3	0	35.53	84.62	1	30	0	4	22	3	3	1	0.682	0.661
Lasiodiplodin	14562696	292.17	4.293	-1.805	4	1	55.76	74.69	1	45	0	2	21	1	5	2	0.736	0.679
LDD	721165	233.14	1.743	-1.054	3	0	29.54	64.89	3	36	0	2	15	1	3	0	0.763	0.77
Lecanorin	643441	274.08	2.325	1.277	5	3	86.99	79.69	3	34	0	2	18	2	8	2	0.764	0.706
Levistolide A	70698035	380.2	5.343	-0.101	4	0	52.6	105.96	4	56	0	5	28	0	4	3	0.679	0.56
Lichexanthone	5358904	286.08	1.9	-0.01	5	1	64.99	84.27	2	35	0	3	21	2	6	0	0.931	0.935
Licochalcone A	5318998	338.15	3.733	2.314	4	2	66.76	107.47	6	47	0	2	20	2	6	3	0.729	0.605
Licochalcone B	5318999	286.08	1.698	0.325	5	3	86.99	86.52	4	35	0	2	18	2	8	3	0.692	0.579
Limonene	22311	136.13	3.729	2.142	0	0	0	46.02	1	26	0	1	9	0	0	1	0.328	0.488
Liquiritigenin	114829	256.07	0.871	0.409	4	2	66.76	76.92	1	31	0	3	20	2	6	0	0.865	0.835
Lobatin B	5373700	376.15	1.44	0.585	7	1	99.13	95.06	4	51	0	3	25	0	8	4	0.572	0.464
Lonchocarpine	6283743	306.13	3.97	2.215	3	1	46.53	100.48	3	41	0	3	22	2	4	2	0.868	0.815
Lovastatin	53232	404.26	4.574	-0.099	5	1	72.83	105.65	7	65	0	3	24	0	6	2	0.727	0.664
Lupeol	259846	426.39	11.901	3.231	1	1	20.23	130.04	1	81	0	5	34	0	2	1	0.486	0.584
Lusianthridin	442702	242.09	1.698	0.524	3	2	49.69	76.62	1	32	0	3	19	2	5	0	0.849	0.815
Luteolin	5280445	286.05	1.486	-0.787	6	4	107.22	81.76	1	31	0	3	22	2	10	2	0.591	0.551
Luteolin-7-O-glucoside	5280637	448.1	0.18	-2.878	11	7	186.37	114.46	4	52	0	4	31	2	18	2	0.186	0.255
Magnoflorine	73337	342.17	0.924	-1.255	4	2	58.92	101.13	2	49	0	4	26	2	6	1	0.853	0.832
Magnolol	72300	266.13	4.142	2.956	2	2	40.46	90.05	5	38	0	2	16	2	4	1	0.745	0.755
Magnosalin	10454589	416.22	4.568	-0.571	6	0	55.38	123.96	8	62	0	3	24	2	6	0	0.731	0.707
Malabaricone C	100313	358.18	5.435	-1.731	5	4	97.99	98.12	10	52	0	2	17	2	9	3	0.447	0.35
Malbrancheamide	11553183	403.12	2.249	0.966	4	2	44.37	108.77	0	50	0	6	32	2	6	0	0.803	0.767
Malbrancheamide_B	145712532	370.17	1.513	-0.859	3	3	45.57	101.16	0	51	0	6	31	2	6	0	0.732	0.689
Malvidin	159287	331.08	2.099	-1.054	6	4	99.38	92.73	3	39	0	3	23	3	10	1	0.567	0.565
Mangiferin	5281647	422.08	-0.631	-3.58	11	8	197.37	103.87	2	48	0	4	31	2	19	1	0.165	0.248
Manumycin A	6438330	550.27	4.967	-0.145	9	4	145.33	153.47	14	78	0	3	28	0	13	4	0.195	0.15
Maslinic Acid	73659	472.36	8.24	1.907	4	3	77.76	137.08	1	82	1	5	37	0	7	1	0.625	0.562
Masticadienonic_acid	5951616	454.34	8.893	3.558	3	1	54.37	135.74	5	79	1	4	31	0	4	2	0.503	0.555
Maxima flavanone A	101673958	374.19	4.373	3.482	3	0	35.53	121.16	3	54	0	4	28	2	3	1	0.658	0.66
Methyl angolensate	419676	470.23	1.892	0.791	7	0	88.13	123.18	4	68	0	5	34	1	7	3	0.593	0.509
Methyl galbanate	7075765	412.22	4.665	2.697	5	0	61.83	120.88	7	62	0	3	25	1	5	4	0.519	0.368
Methyl Jasmonate	5281929	224.14	2.139	-0.085	3	0	43.37	61.3	6	36	0	1	10	0	3	3	0.614	0.494
Methyl_gallate	7428	184.04	1.285	-0.47	5	3	86.99	46.54	2	21	0	1	11	1	8	3	0.568	0.449
Methyl_haematommate	591773	210.05	1.801	0.151	5	2	83.83	54.29	3	25	0	1	12	1	7	3	0.68	0.56
Methyl_orsellinate	76658	182.06	1.329	0.539	4	2	66.76	49.22	2	23	0	1	11	1	6	2	0.729	0.635
Methylarbutin	80131	286.11	-0.331	-1.749	7	4	108.61	71.9	4	38	0	2	17	1	11	0	0.584	0.622
Methylgomisin O	46192500	430.2	4.052	-0.681	7	0	64.61	122.27	5	61	0	4	29	2	7	0	0.749	0.767
Moracin C	155248	310.12	3.147	1.828	4	3	69.92	98.52	3	41	0	3	22	3	7	1	0.714	0.686
Moringin	153557	311.08	0.881	-0.895	6	3	123.6	82.62	4	38	0	2	18	1	9	2	0.676	0.686
Murpanicin	188750	304.13	1.1	1.128	5	1	64.99	86.42	6	42	0	2	17	1	6	3	0.766	0.645
Murrangatin diacetate	389004	304.13	1.1	1.128	5	1	64.99	86.42	6	42	0	2	17	1	6	3	0.766	0.645
Mutolide	643688	252.14	1.365	-0.135	4	2	66.76	68.67	0	38	0	1	18	0	6	3	0.623	0.496
Myricetin	5281672	318.04	2.182	-1.807	8	6	147.68	85.04	1	33	0	3	24	2	14	2	0.35	0.372
Myristicin	4276	192.08	2.711	0.542	3	0	27.69	57.41	3	26	0	2	12	1	3	1	0.728	0.708
Myrrhanone A	102242791	458.38	6.153	4.501	3	2	57.53	141.98	10	83	0	2	24	0	5	1	0.397	0.361
Myrtucommulone	44587062	668.36	5.998	2.76	10	5	186.5	185.82	8	100	0	3	42	1	15	3	0.177	0.188
N-Cis-feruloyltyramine	6440659	313.13	1.106	0.784	5	3	78.79	96.17	7	42	0	2	17	2	8	1	0.784	0.749
Neoadenostylone	6442373	328.17	3.467	2.202	4	0	52.6	93.92	3	48	0	3	23	1	4	3	0.726	0.605
Neohesperidin	442439	610.19	-1.11	-3.99	15	8	234.29	148.91	7	77	0	5	40	2	23	0	0.095	0.158
Nepetoidin B	5316819	314.08	2.338	0.38	6	4	107.22	91.99	5	37	0	2	19	2	10	5	0.448	0.301
Neurolenin A	71306326	364.19	2.661	0.967	6	1	89.9	93.55	4	54	0	2	23	0	7	3	0.7	0.618
Neurolenin B	49799795	422.19	2.371	0.579	8	1	116.2	104.22	6	60	0	2	25	0	9	3	0.551	0.534
Neurolenin C	71306329	380.18	1.631	0.2	7	2	110.13	95.07	4	55	0	2	24	0	9	3	0.662	0.58
Neurolenin D	71306328	380.18	2.06	0.2	7	2	110.13	95.07	4	55	0	2	24	0	9	3	0.662	0.58
Nidemone	21574988	258.09	0.784	-0.426	4	1	63.6	74.6	1	33	0	3	20	1	5	1	0.851	0.812
n-octacosyl-trans-p-coumarate	92041025	556.49	16.078	-6.51	3	1	46.53	134.19	30	104	0	1	10	1	4	4	0	0
Nonacosan-4-olide	11102176	436.43	14.124	-7.255	2	0	26.3	92.93	24	87	0	1	7	0	2	3	0	0
N-Transferuloyl tyramine	5280537	313.13	1.106	0.784	5	3	78.79	96.17	7	42	0	2	17	2	8	1	0.784	0.749
Obovatol	100771	282.13	4.715	2.299	3	2	49.69	92.76	6	39	0	2	16	2	5	2	0.805	0.737
Octacosan-4-olide	11048118	422.41	13.555	-6.967	2	0	26.3	90.02	23	84	0	1	7	0	2	3	0.139	0.094
Oleanolic acid	10494	456.36	9.052	2.13	3	2	57.53	134.03	1	81	1	5	36	0	5	1	0.701	0.645
Oleocanthal	11652416	304.13	1.049	0.911	5	1	80.67	86.12	10	42	0	1	12	1	6	4	0.574	0.409
Operculinic_acid_B	101833923	1034.51	0.105	-12.078	25	15	403.59	216.57	25	153	1	5	50	0	40	1	0	0
Orcinol	10436	124.05	1.046	0.724	2	2	40.46	38.45	0	17	0	1	9	1	4	0	0.618	0.563
Oridonin	5321010	364.19	0.248	-1.974	6	4	107.22	89.27	0	54	0	5	30	0	10	2	0.457	0.422
Oroxylin A	5320315	284.07	2.092	-0.16	5	2	75.99	85.19	2	33	0	3	21	2	7	1	0.88	0.867
Osthole	10228	244.11	2.674	2.214	3	0	35.53	75.88	3	34	0	2	16	1	3	3	0.667	0.558
Ovalichromene B	10981007	350.12	2.524	0.604	5	0	53.99	103.65	1	44	0	5	29	2	5	0	0.852	0.835
Ovaliflavanone C	42607824	352.13	2.982	1.458	5	1	64.99	105.08	3	46	0	4	26	2	6	1	0.937	0.931
Ovaliflavanone D	42607825	420.19	4.605	3.14	5	1	64.99	128.72	5	59	0	4	29	2	6	1	0.725	0.709
Oxoglaucine	97662	351.11	1.155	-1.143	6	0	66.35	103.93	4	43	0	4	25	3	6	0	0.706	0.725
Paeoniflorin	442534	480.16	-0.464	-2.183	11	5	164.37	112.08	7	62	0	6	32	1	16	2	0.24	0.31
Paeonol	11092	166.06	1.199	-0.108	3	1	46.53	48.76	2	22	0	1	10	1	4	1	0.758	0.697
Palmarumycin C11	139587470	334.08	0.822	0.449	5	2	71.45	97.85	0	39	0	6	30	3	7	1	0.704	0.676
Panepoxydone	10130519	210.09	-0.306	0.182	4	2	70.06	54.81	2	29	0	2	14	0	6	2	0.714	0.635
Paucinone_E	132521549	644.3	7.733	3.054	9	4	150.59	190.55	9	91	0	4	41	1	13	5	0.173	0.126
Pedalitin	31161	316.06	2.155	-1.286	7	4	116.45	88.4	2	35	0	3	23	2	11	2	0.563	0.563
Penicillic_acid	1268111	170.06	0.519	0.513	4	1	63.6	43.88	4	22	1	0	7	0	5	2	0.698	0.612
Pentacosan-4-olide	10861829	380.37	11.848	-6.103	2	0	26.3	81.28	20	75	0	1	7	0	2	3	0.187	0.14
Pepluanone	44433090	584.3	3.204	0.49	9	1	125.43	153.47	9	86	0	5	37	1	10	2	0.429	0.444
Perezone	92964	248.14	3.377	2.19	3	1	54.37	73.46	4	38	0	1	14	0	4	3	0.692	0.573
Periplocoside A	163942	1410.75	5.769	-3.303	27	2	286.89	334.32	21	213	0	12	89	0	29	5	0.048	0.05
Petrosaspongiolide M	17748437	460.28	7.901	1.371	6	1	82.06	120.09	3	73	0	5	34	0	7	2	0.698	0.651
Phaseol	44257530	336.1	2.951	1.658	5	2	75.99	101.31	2	41	0	4	26	3	7	3	0.642	0.545
Phillygenin	3083590	372.16	1.637	-0.641	6	1	66.38	106.07	5	51	0	4	25	2	7	0	0.889	0.914
Phloretin	4788	274.08	1.803	-0.003	5	4	97.99	80.65	4	34	0	2	17	2	9	1	0.703	0.675
Phloroglucinol	359	126.03	0.573	-0.286	3	3	60.69	35.77	0	15	0	1	9	1	6	0	0.585	0.5
Phorbaketal A	44605826	398.25	3.044	3.579	4	1	55.76	119.5	5	63	0	3	26	0	5	1	0.629	0.619
p-hydroxybenzoic_acid	135	138.03	0.268	0.405	3	2	57.53	38.56	1	16	1	1	9	1	5	0	0.699	0.626
p-Hydroxyphenylethanol	10393	138.07	0.037	0.452	2	2	40.46	43.07	2	20	0	1	8	1	4	0	0.691	0.653
Physalin A	44577487	526.18	-0.123	-0.642	10	3	156.66	127.36	0	68	0	7	44	0	13	4	0.257	0.246
Physalin G	56683730	526.18	-0.618	-1.046	10	2	145.66	125.52	0	68	0	8	45	0	12	2	0.365	0.438
Physalin L	71307570	528.2	0.253	-1.038	10	3	156.66	127.66	0	70	0	7	44	0	13	2	0.32	0.387
Physalin O	495589	528.2	0.253	-0.859	10	3	156.66	127.79	0	70	0	7	44	0	13	3	0.29	0.316
Physcion	10639	284.07	0.838	0.318	5	2	83.83	81.86	1	33	0	3	22	2	7	0	0.866	0.863
Piceatannol	667639	244.07	2.185	0.631	4	4	80.92	76.21	2	30	0	2	17	2	8	2	0.655	0.567
Picein	92123	298.11	-0.776	-1.7	7	4	116.45	74.81	4	39	0	2	18	1	11	1	0.571	0.607
Pinnatin	5320607	292.07	2.54	0.117	4	0	44.76	91.27	2	34	0	4	23	3	4	1	0.735	0.716
Pinobanksin	73202	272.07	1.169	-0.243	5	3	86.99	78.26	1	32	0	3	21	2	8	0	0.77	0.751
Pinobanksin_5-methylether	147459	286.08	1.49	-0.179	5	2	75.99	83.3	2	35	0	3	21	2	7	0	0.898	0.901
Pinostrobin	73201	270.09	1.825	0.474	4	1	55.76	81.96	2	34	0	3	20	2	5	0	0.936	0.925
Pinosylvin	5280457	212.08	3.184	1.757	2	2	40.46	73	2	28	0	2	15	2	4	1	0.76	0.78
Piperine	638024	285.14	2.518	-0.635	4	0	38.77	82.03	4	40	0	3	19	1	4	2	0.793	0.743
pistillarin	10319809	417.19	1.29	-2.344	9	7	151.15	111.66	13	57	0	2	18	2	16	2	0.2	0.202
Plantamajoside	5281788	640.2	-1.41	-2.793	16	10	265.52	156.42	12	81	0	4	36	2	26	4	0.6	0.071
Pleionesin C	102097659	462.17	2.442	0.011	7	2	94.45	135.35	6	60	0	5	32	3	9	2	0.569	0.548
Plumbagin	10205	188.05	0.17	0.729	3	1	54.37	55.34	0	22	0	2	15	1	4	0	0.751	0.689
Plumericin	5281545	290.08	0.877	-0.097	6	0	71.06	70.47	2	35	0	4	22	0	6	5	0.506	0.339
Pogostone	54695756	224.1	2.696	0.678	4	1	63.6	60.99	4	32	0	1	12	0	5	4	0.602	0.433
Polyanthinin	7002233	424.22	4.85	1.936	5	0	61.83	121.49	5	63	0	4	29	1	5	4	0.582	0.416
Pongachin	155236	336.14	2.99	1.302	4	0	44.76	104.17	2	45	0	4	26	2	4	0	0.889	0.881
Pongachromene	14033985	378.11	3.112	0.142	6	0	63.22	111.99	2	46	0	5	30	2	6	1	0.826	0.816
Pongaflavone	14033983	334.12	3.338	1.339	4	0	44.76	105.87	2	43	0	4	26	2	4	1	0.873	0.849
Ponganone III	15160702	366.15	2.597	0.803	5	0	53.99	110.81	3	49	0	4	27	2	5	0	0.891	0.886
Pongapin	3083586	336.06	2.314	-0.973	6	0	63.22	97.47	2	37	0	5	27	3	6	1	0.692	0.693
Pongapinnol C	12993003	308.07	1.826	-0.34	5	1	64.99	92.95	2	35	0	4	24	3	6	1	0.779	0.774
Poricoic Acid A	5471851	498.33	7.027	3.161	5	3	94.83	144.78	10	82	2	3	28	0	8	1	0.434	0.386
Postia Secoguaianolide	57392887	262.12	0.146	0.718	4	0	60.44	69.63	4	37	0	2	16	0	4	3	0.684	0.561
Preussochromone_C	57333290	292.06	-0.552	-1.471	7	2	102.29	73.65	2	33	0	3	21	1	9	3	0.618	0.572
Preussomerin C	14845980	396.08	-1.256	-0.951	8	2	106.98	101.74	1	45	0	7	34	2	10	1	0.676	0.752
Pristimerin	159516	464.29	8.301	2.734	4	1	63.6	139.1	2	74	0	5	36	0	5	3	0.579	0.465
Prostratol	45268825	460.26	5.74	5.454	4	2	66.76	147.83	7	70	0	3	29	2	6	1	0.444	0.442
Protocatechuic acid	72	154.03	0.616	-0.158	4	3	77.76	40.17	1	17	1	1	10	1	7	1	0.632	0.554
Prunasin	119033	295.11	-1.157	-1.122	7	4	123.17	74.24	4	38	0	2	18	1	11	0	0.609	0.666
Pseudopterosin A	11732783	432.25	4.368	0.885	6	4	99.38	119.61	3	67	0	4	31	1	10	1	0.634	0.608
Pterostilbene	5281727	256.11	2.69	1.323	3	1	38.69	84.68	4	35	0	2	16	2	4	1	0.904	0.894
Puerarin	5281807	416.11	-0.721	-2.255	9	6	156.91	109.67	3	50	0	4	30	2	15	1	0.31	0.377
Purgic_acid_A	16091608	1152.54	-1.634	-12.026	29	16	451.51	241.71	26	167	1	6	58	0	45	1	0	0
Purgic_acid_B	16091605	1180.57	-0.496	-12.602	29	16	451.51	247.54	28	173	1	6	58	0	45	1	0	0
Pyrenocine A	6312351	208.07	1.465	0.573	4	0	52.6	58.66	3	27	0	1	12	0	4	4	0.547	0.384
Quercitrin	5280459	448.1	0.802	-2.835	11	7	186.37	114.76	3	52	0	4	32	2	18	2	0.187	0.256
Quianhucoumarin_D	10450303	346.11	1.773	0.565	7	0	88.13	89.32	4	43	0	3	23	1	7	3	0.684	0.617
Quinolonimide	11492325	228.05	0.242	-0.32	5	1	66.48	63.81	0	25	0	3	19	1	6	1	0.767	0.719
Radinaphthalenone	139583325	206.06	-0.125	-0.126	4	2	74.6	55.8	0	25	0	2	16	1	6	0	0.744	0.69
Resveratrol	445154	228.08	2.048	1.194	3	3	60.69	74.61	2	29	0	2	16	2	6	1	0.774	0.713
Retusin	5352005	358.11	2.26	-0.986	7	1	83.45	103.59	5	44	0	3	23	2	8	1	0.82	0.871
Rhein	10168	284.03	-0.261	-0.065	6	3	111.9	76.93	1	29	1	3	22	2	9	0	0.731	0.759
Rhinacanthin C	6474554	410.21	4.322	4.071	5	1	80.67	123.39	9	60	0	2	22	1	6	6	0.314	0.191
Rhodojaponin I	44583963	368.22	0.323	-1.84	6	5	113.68	90.35	0	58	0	5	30	0	11	1	0.428	0.409
Rhodojaponin II	101306702	410.23	0.634	-1.461	7	4	119.75	99.51	2	63	0	5	31	0	11	3	0.426	0.38
Rhodojaponin III	21151017	368.22	0.323	-1.84	6	5	113.68	90.35	0	58	0	5	30	0	11	1	0.428	0.409
Rhodojaponin VI	11581815	386.23	-0.266	-2.607	7	7	141.61	93.87	0	61	0	4	30	0	14	0	0.28	0.288
Rhodojaponin VII	101316852	470.25	0.785	-1.849	9	5	153.75	112.17	4	71	0	4	32	0	14	2	0.301	0.344
Rhodomollein XI	11201193	428.24	0.045	-2.228	8	6	147.68	103.02	2	66	0	4	31	0	14	2	0.289	0.303
Robustaflavone	5281694	538.09	2.03	-0.839	10	6	173.98	157.86	3	58	0	6	42	4	16	1	0.179	0.228
Rosmanol	13966122	346.18	3.867	-0.139	5	3	86.99	93.09	1	51	0	4	27	1	8	3	0.646	0.532
Rotenone	6758	394.14	1.867	0.139	6	0	63.22	114.15	3	51	0	5	30	2	6	1	0.828	0.818
Rubrofusarin_B	176918	286.08	1.649	-0.319	5	1	64.99	84.42	2	35	0	3	21	2	6	1	0.906	0.895
Ruscogenin	441893	430.31	4.378	-0.296	4	2	58.92	115.28	0	73	0	6	36	0	6	1	0.702	0.644
Sanguinarine	5154	332.09	3.002	-2.623	4	0	39.93	97.3	0	39	0	6	30	4	4	2	0.382	0.354
Santin	5281695	344.09	1.939	-1.05	7	2	94.45	98.55	4	41	0	3	23	2	9	1	0.799	0.859
Saurolactam	131002	279.09	1.749	0.256	4	1	49.77	86.84	1	34	0	4	23	3	5	1	0.755	0.731
Savinin	5281867	352.09	2.044	0.231	6	0	63.22	99.39	3	42	0	5	27	2	6	3	0.727	0.621
Scammonic_acid_A	14704611	872.46	1.875	-9.608	20	11	313.44	184.09	23	132	1	4	40	0	31	1	0.027	0.036
Schisantherin	101769189	536.2	4.003	0.049	9	1	101.91	153.05	7	71	0	5	36	3	10	2	0.445	0.462
Sclareol	163263	308.27	5.989	1.976	2	2	40.46	90.9	4	58	0	2	19	0	4	1	0.811	0.828
Scoparone	8417	206.06	1.291	0.034	4	0	44.76	58.89	2	25	0	2	14	1	4	2	0.722	0.64
Scopoletin	5280460	192.04	0.97	-0.031	4	1	55.76	53.85	1	22	0	2	14	1	5	2	0.73	0.638
Scutellarin	185617	462.08	0.337	-2.776	12	7	203.44	114.32	4	51	1	4	32	2	19	2	0.167	0.249
Securinine	442872	217.11	1.018	-0.427	3	0	29.54	55.53	0	31	0	4	19	0	3	2	0.599	0.539
Seravshanin	10317265	374.14	2.319	1.29	7	0	88.13	98.98	5	49	0	3	24	1	7	3	0.663	0.591
Serjanic acid	12315473	500.35	6.879	1.499	5	2	83.83	140.52	3	84	1	5	37	0	7	3	0.584	0.468
Shikonin	479503	288.1	1.154	0.825	5	3	94.83	81.96	3	37	0	2	19	1	8	2	0.757	0.709
Shizukahenriol	122213193	676.29	1.375	0.918	11	2	162.73	173.46	9	93	0	8	47	0	13	4	0.219	0.215
Silibinin	31553	482.12	0.855	-1.848	10	5	155.14	132.21	4	57	0	5	35	3	15	0	0.274	0.365
Sinomenine	5459308	329.16	0.61	-0.319	5	1	59	95.84	2	47	0	4	25	1	6	1	0.908	0.9
Sporogen_AO-1	177175	248.14	0.021	0.235	3	1	49.83	66.52	1	38	0	3	19	0	4	2	0.751	0.679
Stellarine A	50993701	253.09	0.394	-0.914	5	2	84.55	75.18	2	30	0	3	19	3	7	1	0.697	0.687
Stellarine B	53322155	337.11	1.058	-1.063	7	2	96.86	96.65	6	40	0	3	21	3	9	4	0.483	0.389
Steviol	452967	318.22	3.994	0.883	3	2	57.53	87.66	1	53	1	4	25	0	5	1	0.822	0.789
Stevioside	442089	804.38	0.043	-4.515	18	11	294.98	184.92	10	116	0	7	52	0	29	4	0.044	0.054
Suaveolol	11975519	306.26	4.103	0.27	2	2	40.46	89.49	2	56	0	3	22	0	4	1	0.809	0.819
Taiwanin C	363127	348.06	1.995	0.097	6	0	63.22	98.49	1	38	0	6	30	3	6	2	0.654	0.612
Tanshinone I	114917	276.08	2.493	1.54	3	0	43.37	85.57	0	33	0	4	24	3	3	1	0.666	0.628
Tanshinone IIA	164676	294.13	3.247	0.909	3	0	43.37	86.92	0	40	0	4	25	2	3	1	0.798	0.752
Taraxasteryl acetate	13889352	468.4	12.536	2.943	2	0	26.3	139.06	2	86	0	5	36	0	2	3	0.473	0.406
Tenuifoliside B	10055215	668.2	-1.636	-2.919	17	8	260.59	162.44	14	83	0	4	36	2	25	3	0.062	0.081
Tetracosan-4-olide	11143096	366.35	11.279	-5.815	2	0	26.3	78.37	19	72	0	1	7	0	2	3	0.201	0.153
Tetramethyl-O-scutellarin	96118	342.11	2.341	-0.529	6	0	63.22	101.91	5	43	0	3	22	2	6	1	0.839	0.838
Thielavin-A	194424	538.18	4.471	3.627	10	5	170.82	148.34	7	69	1	3	34	3	15	2	0.177	0.216
Thielavin-J	10875192	538.18	4.182	3.245	10	4	159.82	149.1	8	69	1	3	33	3	14	2	0.22	0.263
Thielavin-K	10940623	552.2	4.363	3.691	10	4	159.82	153.38	8	72	1	3	34	3	14	2	0.194	0.232
Thymol	6989	150.1	2.487	1.664	1	1	20.23	49.89	1	25	0	1	10	1	2	0	0.559	0.643
Thymoquinone	10281	164.08	1.102	1.018	2	0	34.14	48.51	1	24	0	1	11	0	2	1	0.609	0.573
Tillandsinone	21592247	466.42	12.94	4.004	1	0	17.07	143.27	6	88	0	5	32	0	1	1	0.36	0.433
Toddalenone	101893838	274.08	1.358	-0.055	5	0	61.83	78.68	4	34	0	2	17	1	5	3	0.725	0.602
Tokinolide B	11090206	380.2	4.778	0.062	4	0	52.6	105.21	4	56	0	5	28	0	4	3	0.681	0.561
Tomentosin	155173	248.14	1.717	0.631	3	0	43.37	68.56	3	38	0	2	16	0	3	4	0.578	0.418
Torilin	6450226	376.22	3.188	2.584	5	0	69.67	102.9	6	59	0	2	22	0	5	3	0.606	0.512
Tormentic Acid	73193	488.35	5.966	0.822	5	4	97.99	137.37	1	83	1	5	38	0	9	1	0.53	0.474
Trans-Cinnamaldehyde	637511	132.06	1.968	1.376	1	0	17.07	46.27	2	18	0	1	8	1	1	2	0.481	0.516
Trehalose	7427	342.12	-3.234	-4.26	11	8	189.53	68.34	4	45	0	2	20	0	19	0	0.163	0.253
Triacontan-4-olide	10983249	450.44	14.693	-7.543	2	0	26.3	95.84	25	90	0	1	7	0	2	3	0	0
Trilinolein	5322095	878.74	24.175	-2.427	6	0	78.9	236.14	50	161	0	0	12	0	6	4	0	0
Tripchlorolide	159588	396.13	0.715	-0.449	6	2	91.82	93.72	1	52	0	6	31	0	8	4	0.532	0.4
Triptolide	107985	360.16	-0.007	-0.887	6	1	84.12	87.16	1	50	0	7	31	0	7	3	0.64	0.554
Tryptanthrin	73549	248.06	0.446	0.658	4	0	49.74	77.11	0	27	0	4	22	2	4	0	0.782	0.736
Tunicatachalcone	5324259	406.21	5.997	4.105	4	1	63.6	130.67	7	60	0	2	24	1	5	4	0.414	0.302
Uliginosin A	5315117	500.24	4.577	2.471	8	5	152.36	142.81	8	72	0	2	29	1	13	4	0.252	0.202
Umbelliferone	5281426	162.03	0.73	0.468	3	1	46.53	47.2	0	18	0	2	13	1	4	2	0.656	0.554
Umbelliprenin	1781413	366.22	5.896	4.462	3	0	35.53	119.2	9	57	0	2	19	1	3	3	0.394	0.328
Ursolic acid	64945	456.36	8.954	1.484	3	2	57.53	132.26	1	81	1	5	36	0	5	1	0.72	0.661
Usneoidone E	15139101	454.27	3.614	3.128	5	1	72.83	137.28	10	71	0	2	24	1	6	2	0.547	0.474
Uvaol	92802	442.38	9.261	1.275	2	2	40.46	132.31	1	82	0	5	35	0	4	1	0.703	0.678
Vicenin-2	442664	594.16	-2.552	-5.087	15	11	267.29	144.87	5	72	0	5	41	2	26	1	0.086	0.15
Vitexin	5280441	432.11	-0.707	-2.655	10	7	177.14	112.51	3	51	0	4	31	2	17	1	0.229	0.307
Vitisinol A	11453765	452.13	1.447	0.816	6	4	99.38	138.76	2	54	0	7	38	5	10	0	0.358	0.348
Wedelolactone	5281813	314.04	1.916	-1.086	7	3	105.45	85.92	1	33	0	4	25	3	10	3	0.486	0.438
Withaferin A	265237	470.27	3.987	0.642	6	2	96.36	125.06	3	72	0	6	36	0	8	3	0.59	0.498
Wogonin	5281703	284.07	2.092	-0.16	5	2	75.99	85.19	2	33	0	3	21	2	7	1	0.88	0.867
Xanthohumol	639665	354.15	3.532	2.007	5	3	86.99	110.16	6	48	0	2	21	2	8	3	0.656	0.544
Xanthorrhizol	93135	218.17	4.414	3.292	1	1	20.23	73.16	4	38	0	1	12	1	2	1	0.536	0.653
Xerantholide	442337	246.13	1.014	1.23	3	0	43.37	66.01	0	36	0	3	20	0	3	3	0.595	0.472
Xylarinol_A	42603801	176.05	0.715	0.731	3	1	46.53	51.37	0	21	0	2	14	1	4	2	0.675	0.576
Xylarinol_B	42603802	224.1	-0.419	-1.002	4	3	69.92	60.59	1	32	0	2	16	1	7	0	0.709	0.661
Yangonin	5281575	258.09	2.046	0.969	4	0	44.76	79.52	4	33	0	2	16	1	4	3	0.72	0.595
Zaluzanin_C_isobutyrate	11099125	316.17	2.34	2.186	4	0	52.6	84.96	3	47	0	3	22	0	4	4	0.592	0.434
Zaluzanin_C_isovalerate	10936430	330.18	3.124	2.059	4	0	52.6	88.7	4	50	0	3	22	0	4	4	0.599	0.438
Zerumbone	5470187	218.17	4.143	3.479	1	0	17.07	72.49	0	38	0	1	16	0	1	1	0.396	0.468
Z-Guggulsterone	6450278	312.21	4.086	1.287	2	0	34.14	93.34	0	51	0	4	26	0	2	1	0.704	0.697
Ziganein	5316800	254.06	0.598	0.817	4	2	74.6	75.22	0	29	0	3	21	2	6	0	0.818	0.779
Z-ligustilide	5319022	190.1	2.819	0.811	2	0	26.3	56.71	2	28	0	2	13	0	2	3	0.544	0.463
Zonarol	332671	314.22	6.864	1.994	2	2	40.46	97.89	2	53	0	3	23	1	4	2	0.803	0.771

## Sheet: QED NPs
Natural products (NP) dataset
names	pubchem ID	MW	logp	Alogp	HBA	HBD	TPSA	AMR	nRB	nAtom	nAcidicGroup	RC	nRigidB	nAromRing	nHB	SAlerts	uwQDE	wQED
(-)-Epicatechin	72276	290.08	0.852	-0.936	6	5	110.38	81.07	1	35	0	3	22	2	11	1	0.545	0.524
(+)-Syringaresinol	443023	418.16	1.796	-1.703	8	2	95.84	114.32	6	56	0	4	27	2	10	0	0.648	0.724
(Z)-Coniferyl Alcohol	1549094	180.08	0.684	0.165	3	2	49.69	55.58	3	25	0	1	10	1	5	0	0.795	0.748
1,8-Cineol	2758	154.14	2.595	1.311	1	0	9.23	44.03	0	29	0	2	12	0	1	0	0.44	0.524
10-Methoxycanthin-6-one	158928	250.07	0.244	-1.007	4	0	41.9	77.94	1	29	0	4	21	3	4	0	0.661	0.643
17-O-Acetylacuminolide	380682	392.22	4.684	0.812	6	1	82.06	99.9	4	60	0	4	27	0	7	2	0.762	0.74
22,27-Dinorzyggomphic acid B	46938548	362.22	6.974	4.277	2	1	37.3	119.08	4	57	1	3	25	1	3	2	0.543	0.543
27-Nor-zyggomphic acid	46938443	376.24	7.366	4.724	2	1	37.3	123.36	4	60	1	3	26	1	3	2	0.503	0.503
2'-methoxykobusin	637889	400.15	2.125	-1.275	7	0	64.61	110.59	5	53	0	5	28	2	7	0	0.746	0.776
3,3'-Diindolylmethane	3071	246.12	2.489	0.64	2	2	24.06	86.01	2	33	0	4	20	4	4	0	0.53	0.57
3',4',7-Trimethoxyflavanone	9818297	314.12	1.753	0.04	5	0	53.99	93.64	4	41	0	3	21	2	5	0	0.903	0.904
3-Epimaslinic acid	25564831	472.36	8.24	1.907	4	3	77.76	137.08	1	82	1	5	37	0	7	1	0.625	0.562
3'-Methoxypongapin	15838767	366.07	2.554	-1.471	7	0	72.45	104.11	3	41	0	5	28	3	7	1	0.635	0.663
4-hydroxybenzaldehyde	126	122.04	0.349	0.452	2	1	37.3	37.64	1	15	0	1	8	1	3	1	0.647	0.595
2'-methoxykobusin	637889	400.15	2.125	-1.275	7	0	64.61	110.59	5	53	0	5	28	2	7	0	0.746	0.776
3,3'-Diindolylmethane	3071	246.12	2.489	0.64	2	2	24.06	86.01	2	33	0	4	20	4	4	0	0.53	0.57
3',4',7-Trimethoxyflavanone	9818297	314.12	1.753	0.04	5	0	53.99	93.64	4	41	0	3	21	2	5	0	0.903	0.904
3-Epimaslinic acid	25564831	472.36	8.24	1.907	4	3	77.76	137.08	1	82	1	5	37	0	7	1	0.625	0.562
3'-Methoxypongapin	15838767	366.07	2.554	-1.471	7	0	72.45	104.11	3	41	0	5	28	3	7	1	0.635	0.663
4-Hydroxycordoin	5879763	324.14	3.191	2.354	4	2	66.76	104.03	6	44	0	2	19	2	6	3	0.728	0.605
4-Methoxy-5-hydroxycanthin-6-one	5320161	266.07	0.803	-1.356	5	1	62.13	79.69	1	30	0	4	22	3	6	1	0.685	0.668
4-O-Methylhonokiol	155160	280.15	4.041	3.02	2	1	29.46	95.08	6	41	0	2	16	2	3	1	0.772	0.758
5-hydroxymethylfurfural	237332	126.03	-0.383	-0.753	3	1	46.53	34.48	2	15	0	1	7	1	4	1	0.685	0.615
5-methoxypsoralen	2355	216.04	1.337	-0.317	4	0	44.76	61.53	1	24	0	3	17	2	4	2	0.711	0.626
6-8-Diprenyleriodictyol	101705716	424.19	4.384	2.646	6	4	107.22	127.41	5	59	0	3	28	2	10	2	0.546	0.506
6-Gingerol	442793	294.18	2.437	-1.597	4	2	66.76	80.8	10	47	0	1	11	1	6	1	0.693	0.643
6-Shogaol	5281794	276.17	3.775	-0.217	3	1	46.53	82.07	9	44	0	1	11	1	4	2	0.756	0.675
7-Deacetylgedunin	3034112	440.22	2.817	0.435	6	1	85.36	117.33	1	64	0	6	36	1	7	3	0.65	0.544
8-Gingerol	168114	322.21	3.575	-2.173	4	2	66.76	86.63	12	53	0	1	11	1	6	1	0.59	0.537
8-methoxypsoralen	4114	216.04	1.337	-0.317	4	0	44.76	61.53	1	24	0	3	17	2	4	2	0.711	0.626
Aciculatin	131704	414.13	0.918	-1.868	8	4	125.68	113.12	3	52	0	4	30	2	12	1	0.489	0.546
Albaconol	5317148	346.25	6.001	1.913	3	3	60.69	103.23	2	59	0	3	25	1	6	0	0.828	0.798
Aloe Emodin	10207	270.05	-0.65	-0.274	5	3	94.83	76.99	1	30	0	3	21	2	8	0	0.76	0.747
Aloifol_II	176096	304.13	2.424	-0.082	5	2	68.15	92.34	6	42	0	2	17	2	7	0	0.901	0.899
Alpinetin	154279	270.09	1.825	0.474	4	1	55.76	81.96	2	34	0	3	20	2	5	0	0.936	0.925
Alpinone	5317747	286.08	1.49	-0.179	5	2	75.99	83.3	2	35	0	3	21	2	7	0	0.898	0.901
Apigenin	5280443	270.05	1.138	-0.224	5	3	86.99	80.15	1	30	0	3	21	2	8	1	0.755	0.722
Arglanin	12305204	262.12	0.423	0.412	4	1	63.6	68.62	0	37	0	3	21	0	5	3	0.653	0.525
Asperimide C	146684424	379.14	0.729	0.976	6	3	95.86	110.26	3	49	0	4	28	2	9	1	0.775	0.779
Asperimide D	146684425	379.14	0.729	0.976	6	3	95.86	110.26	4	49	0	4	27	2	9	1	0.777	0.781
Atractylodin	5321047	182.07	3.775	2.37	1	0	9.23	64.32	1	24	0	1	13	1	1	1	0.488	0.592
Atractylon	3080635	216.15	3.691	1.197	1	0	9.23	66.87	0	36	0	3	18	1	1	1	0.52	0.632
Austroinulin	70698052	322.25	5.811	1.215	3	3	60.69	93.88	3	57	0	2	21	0	6	1	0.791	0.755
Avarol	72185	314.22	6.625	2.828	2	2	40.46	98.93	2	53	0	3	23	1	4	2	0.729	0.704
Baicalein	5281605	270.05	2.629	-0.224	5	3	86.99	80.15	1	30	0	3	21	2	8	2	0.713	0.647
Bakuchiol	5468522	256.18	6.454	3.966	1	1	20.23	89.35	6	43	0	1	13	1	2	1	0.467	0.58
b-amyrin	73145	426.39	11.546	3.012	1	1	20.23	132.32	0	81	0	5	35	0	2	1	0.484	0.571
Batatasin_III	10466989	244.11	2.155	0.916	3	2	49.69	79.06	4	34	0	2	15	2	5	0	0.903	0.883
Benzomalvin_A	10068406	381.15	1.921	1.503	5	0	52.98	122.83	2	48	0	5	31	3	5	0	0.73	0.721
Berberine	2353	336.12	2.473	-2.525	4	0	39.93	98.84	2	43	0	5	27	3	4	1	0.574	0.574
Berenjenol	16681372	456.4	10.152	1.887	2	1	29.46	132.88	2	85	0	6	36	0	3	0	0.771	0.729
Betulin	72326	442.38	9.714	2.141	2	2	40.46	131.81	2	82	0	5	34	0	4	1	0.707	0.691
Betulinic Acid	64971	456.36	9.407	2.35	3	2	57.53	131.75	2	81	1	5	35	0	5	1	0.713	0.664
Bornyl Cinnamate	5371827	284.18	5.441	2.881	2	0	26.3	87.99	4	45	0	3	19	1	2	3	0.598	0.54
Bourjotinolone A	21603611	472.36	6.651	1.618	4	2	66.76	135.76	2	82	0	5	36	0	6	1	0.724	0.669
Brazilin	73384	286.08	0.405	-0.484	5	4	90.15	82.07	0	35	0	4	24	2	9	1	0.636	0.586
Brevipolide_K	132850049	402.17	1.864	0.114	7	1	91.29	106.8	8	55	0	3	23	1	8	3	0.624	0.546
Brevipolide_L	132850050	388.15	1.543	0.049	7	2	102.29	101.76	7	52	0	3	23	1	9	3	0.627	0.563
Brevipolides_G	71522010	386.14	0.946	0.121	7	2	110.13	104.08	8	50	0	3	22	1	9	3	0.598	0.539
Brevipolides_H	71521993	400.15	1.267	0.186	7	1	99.13	109.12	9	53	0	3	22	1	8	3	0.595	0.52
b-sitosterol	222284	414.39	11.595	1.3	1	1	20.23	123.88	6	80	0	4	27	0	2	1	0.617	0.742
Cacospongionolide B	10386285	400.26	6.078	1.613	4	1	55.76	113.1	4	65	0	4	28	0	5	3	0.71	0.589
Caffeic acid	689043	180.04	0.888	0.203	4	3	77.76	50.41	2	21	1	1	11	1	7	2	0.655	0.561
Calein_B	90474242	420.18	2.038	1.326	8	1	116.2	105.73	5	58	0	2	26	0	9	3	0.564	0.551
Calein_C	66551442	420.18	2.038	1.326	8	1	116.2	105.73	5	58	0	2	26	0	9	3	0.564	0.551
Calocedrin	9999082	368.09	1.509	-0.109	7	1	83.45	100.42	3	43	0	5	28	2	8	3	0.723	0.655
Canophyllal	12302400	440.37	10.533	2.383	2	0	34.14	133.33	1	80	0	5	35	0	2	1	0.634	0.618
Canophyllol	7330581	442.38	10.426	2.127	2	1	37.3	134.32	1	82	0	5	35	0	3	0	0.709	0.707
Canthin-6-one	97176	220.06	0.215	-0.508	3	0	32.67	71.29	0	25	0	4	20	3	3	0	0.603	0.579
Capnoidine	120698	367.11	1.446	-0.177	7	0	66.46	100.13	1	44	0	6	31	2	7	2	0.726	0.698
Carabrone	164879	248.14	2.424	0.429	3	0	43.37	66.19	3	38	0	3	17	0	3	3	0.663	0.545
Cardamonin	641785	270.09	3.045	0.888	4	2	66.76	84.92	4	34	0	2	17	2	6	2	0.864	0.795
Carnosic acid	65126	332.2	5.474	0.592	4	3	77.76	93.98	2	52	1	3	24	1	7	1	0.821	0.785
Carnosol	442009	330.18	5.108	0.628	4	2	66.76	91.58	1	50	0	4	26	1	6	3	0.741	0.609
Carpesiolin	10015663	264.14	0.669	0.207	4	1	63.6	66.41	0	39	0	3	21	0	5	3	0.653	0.526
Carvacrol	10364	150.1	2.487	1.664	1	1	20.23	49.89	1	25	0	1	10	1	2	0	0.559	0.643
Caryophyllene_oxide	1742210	220.18	4.607	1.914	1	0	12.53	64.19	0	40	0	3	18	0	1	2	0.465	0.528
Casticin	5315263	374.1	2.179	-1.549	8	2	103.68	105.2	5	45	0	3	24	2	10	1	0.687	0.78
Celastrol	122724	450.28	7.98	2.483	4	2	74.6	134.33	1	71	1	5	36	0	6	1	0.678	0.631
Chalcone	637760	208.09	3.171	2.513	1	0	17.07	75.06	3	28	0	2	14	2	1	2	0.535	0.609
Chrysin	5281607	254.06	1.852	0.339	4	2	66.76	78.55	1	29	0	3	20	2	6	1	0.846	0.801
Chrysophanol	10208	254.06	0.598	0.817	4	2	74.6	75.22	0	29	0	3	21	2	6	0	0.818	0.779
Citrinin	54680783	250.08	1.62	-0.345	5	2	83.83	64.44	1	32	1	2	18	0	7	2	0.707	0.65
Clavatol	3083634	180.08	1.24	0.72	3	2	57.53	52.28	1	25	0	1	12	1	5	1	0.745	0.673
Clearanol_C	101540450	234.09	1.375	0.7	4	1	55.76	65.35	1	31	0	2	17	1	5	3	0.709	0.572
Clearanol_F	38355177	268.09	-0.086	-0.499	6	3	96.22	68.61	2	35	0	2	18	1	9	2	0.697	0.661
Clearanol_G	139586700	266.08	-0.353	-0.83	6	3	96.22	69.19	2	33	0	2	18	1	9	3	0.612	0.524
Colchicine	6167	399.17	1.575	-1.241	7	1	83.09	112.92	6	54	0	3	25	1	8	1	0.748	0.779
Collinin	5316012	328.17	4.314	2.732	4	0	44.76	101.92	7	48	0	2	18	1	4	3	0.633	0.522
Comaparvin	324099	300.1	2.15	-0.911	5	2	75.99	86.84	3	38	0	3	21	1	7	1	0.867	0.864
Confusarin	11983285	300.1	2.181	-0.13	5	2	68.15	90.49	3	38	0	3	21	3	7	1	0.775	0.769
Cordycepin	6303	251.1	-2.195	-3.23	8	3	116.03	59.86	2	31	0	3	18	2	11	0	0.461	0.536
Corosolic acid	6918774	472.36	8.142	1.261	4	3	77.76	135.31	1	82	1	5	37	0	7	1	0.636	571
Corymbiferone	136870383	274.05	0.827	-0.964	6	1	82.06	71.72	2	30	0	3	20	0	7	2	0.733	0.708
Corymbiferone_C	102583472	272.07	1.228	0.023	5	0	61.83	75.09	2	32	0	3	20	1	5	3	0.71	0.587
Coumurrayin	176911	274.12	2.914	1.716	4	0	44.76	82.52	4	38	0	2	17	1	4	3	0.725	0.603
Cryptotanshinone	160254	296.14	3.114	0.661	3	0	43.37	86.33	0	42	0	4	25	1	3	2	0.746	0.667
Cudraflavone B	5319925	420.16	3.845	1.83	6	3	96.22	127.68	3	55	0	4	31	2	9	2	0.688	0.646
Curcumin	969516	368.13	1.945	0.522	6	2	93.06	111.7	8	47	0	2	20	2	8	2	0.739	0.689
Curindolizine	132560130	469.27	3.915	0.886	5	1	39.18	150.73	2	70	0	7	39	3	6	0	0.681	0.668
Cyclolaudenol	101729	440.4	12.47	3.029	1	1	20.23	132.94	5	84	0	5	31	0	2	1	0.521	0.629
Cyclolaudenone	21592246	438.39	11.863	3.598	1	0	17.07	133.96	5	82	0	5	31	0	1	1	0.422	0.515
Cynandione A	10063465	302.08	1.51	-0.736	6	4	115.06	84.99	3	36	0	2	20	2	10	2	0.621	0.6
Deacetylkellerin	7091630	400.22	3.488	0.66	5	2	75.99	112.83	3	61	0	4	29	1	7	2	0.816	0.756
Deguelin	107935	394.14	2.341	0.035	6	0	63.22	115.54	2	51	0	5	31	2	6	0	0.827	0.827
Demethoxycurcumin	5469424	338.12	1.916	1.02	5	2	83.83	105.05	7	43	0	2	19	2	7	2	0.808	0.751
Denbinobin	10423984	284.07	0.978	-0.17	5	1	72.83	82.54	2	33	0	3	21	2	6	1	0.906	0.896
Derrivanone	102360079	454.16	2.868	0.571	8	0	97.36	124.08	6	59	0	4	30	2	8	2	0.619	0.624
Des-O-methyllasiodiplodin	14562695	278.15	3.972	-1.87	4	2	66.76	69.65	0	42	0	2	21	1	6	2	0.669	0.601
Diadzein	5281708	254.06	1.124	0.176	4	2	66.76	77.32	1	29	0	3	20	2	6	1	0.844	0.8
Dihydroergolide	57403344	308.16	1.591	0.369	5	0	69.67	75.99	2	46	0	3	22	0	5	2	0.76	0.704
Dihydrosporogen_AO-1	14378703	250.16	-0.072	0.095	3	2	52.99	67.21	1	40	0	3	19	0	5	2	0.734	0.658
Dihydrotanshinone I	11425923	278.09	2.36	1.292	3	0	43.37	84.98	0	35	0	4	24	2	3	2	0.744	0.662
Diligustilide	70698035	380.2	5.343	-0.101	4	0	52.6	105.96	4	56	0	5	28	0	4	3	0.679	0.56
Dillapiole	10231	222.09	2.74	0.043	4	0	36.92	64.05	4	30	0	2	13	1	4	1	0.789	0.761
Diosmetin	5281612	300.06	1.378	-0.723	6	3	96.22	86.8	2	34	0	3	22	2	9	1	0.755	0.762
Discretamine	22955	327.15	1.004	0.205	5	2	62.16	98.57	2	45	0	4	25	2	7	0	0.921	0.923
Dolineone	5316959	336.06	1.47	-1.28	6	0	63.22	93.86	0	37	0	6	30	3	6	0	0.63	0.626
Dopamine	681	153.08	0.318	-0.401	3	3	66.48	46.33	2	22	0	1	9	1	6	1	0.656	0.577
DTB	445027	214.13	0.82	-2.034	5	3	78.43	46.05	6	33	1	1	9	0	8	1	0.569	0.535
Echinatin	6442675	270.09	1.35	0.888	4	2	66.76	84.92	4	34	0	2	17	2	6	2	0.864	0.795
Emodin	3220	270.05	0.517	0.254	5	3	94.83	76.82	0	30	0	3	22	2	8	0	0.73	0.705
Ephemeranthol_B	14777891	272.1	1.938	0.026	4	2	58.92	83.26	2	36	0	3	20	2	6	0	0.909	0.893
Ephemeranthoquinone	10038025	256.07	0.524	-0.015	4	1	63.6	75.31	1	31	0	3	20	1	5	2	0.811	0.733
Epicacalone	21635815	246.13	1.454	-0.265	3	1	46.53	68.48	0	36	0	3	20	1	4	0	0.811	0.775
Epifriedelinol	119242	428.4	13.026	2.486	1	1	20.23	130.7	0	83	0	5	35	0	2	0	0.538	0.642
Epineoadenostylone	14190085	328.17	3.467	2.202	4	0	52.6	93.92	3	48	0	3	23	1	4	3	0.726	0.605
Epitaondiol	156834	412.3	6.523	2.221	3	2	49.69	122.32	0	70	0	5	34	1	5	0	0.764	0.721
Epi-ursolic_acid	14136878	472.36	8.251	0.393	4	3	77.76	134.03	2	82	1	5	36	0	7	1	0.659	0.599
Epoxyazadiradione	49863985	466.24	3.008	0.548	6	0	82.2	125.76	3	68	0	6	36	1	6	3	0.623	0.514
Ergolide	185786	306.15	1.409	0.586	5	0	69.67	75.56	2	44	0	3	22	0	5	3	0.623	0.514
Ergone	6441416	392.31	8.963	2.866	1	0	17.07	125.87	4	69	0	4	28	0	1	1	0.533	0.661
Ergosta-7,22-dien-3-ol	125947	398.35	10.692	1.933	1	1	20.23	122.21	4	75	0	4	28	0	2	1	0.641	0.785
Ergosterol	444679	396.34	9.499	2.256	1	1	20.23	124.06	4	73	0	4	28	0	2	1	0.628	0.771
Erianthridin	10401022	272.1	1.938	0.026	4	2	58.92	83.26	2	36	0	3	20	2	6	0	0.909	0.893
Erinacerin B	11515478	332.16	2.098	2.019	5	2	75.99	96.83	6	48	0	2	19	1	7	3	0.726	0.612
Eugenol	3314	164.08	2.223	1.175	2	1	29.46	52.89	3	24	0	1	9	1	3	1	0.72	0.71
Eupalitin	5748611	330.07	2.047	-1.115	7	3	105.45	93.51	3	38	0	3	23	2	10	1	0.712	0.762
Eupatilin	5273755	344.09	1.939	-1.157	7	2	94.45	98.48	4	41	0	3	23	2	9	1	0.792	0.852
Falcarindiol	5281148	260.18	4.573	0.202	2	2	40.46	74.43	8	43	0	0	10	0	4	3	0.611	0.509
Farnesiferol B	1779468	382.21	3.923	2.233	4	1	55.76	115.25	6	58	0	3	24	1	5	3	0.725	0.599
Farnesiferol C	15559239	382.21	4.319	2.471	4	0	44.76	112.79	6	58	0	4	25	1	4	3	0.656	0.54
Ferukrin	11875840	400.22	3.488	0.66	5	2	75.99	112.83	3	61	0	4	29	1	7	2	0.816	0.756
Ferulic_acid	445858	194.06	0.78	0.267	4	2	66.76	55.45	3	24	1	1	11	1	6	1	0.802	0.748
Fimbriol_A	11335575	300.1	1.97	-0.13	5	2	68.15	90.49	3	38	0	3	21	3	7	1	0.775	0.769
Fisetin	5281614	286.05	1.915	-0.681	6	4	107.22	81.83	1	31	0	3	22	2	10	2	0.594	0.554
Fissilandione	100927180	337.1	1.454	-0.499	6	0	65.07	96.59	1	40	0	5	28	1	6	1	0.795	0.784
Flavone	10680	222.07	2.225	1.465	2	0	26.3	75.34	1	27	0	3	18	2	2	1	0.708	0.709
Fraxinellone	124039	232.11	1.993	0.23	3	0	35.53	63.35	1	33	0	3	18	1	3	2	0.717	0.648
Friedelin	91472	426.39	12.613	3.217	1	0	17.07	132.54	0	81	0	5	35	0	1	0	0.435	0.524
Fucoidan	92023653	242.05	-1.725	-1.733	7	3	121.67	47.8	2	29	1	1	13	0	10	1	0.549	0.593
Fumiquinone_B	136773313	184.04	0.889	-0.77	5	2	83.83	45.47	1	21	0	1	12	0	7	2	0.621	0.55
Furanodiene	636458	216.15	3.43	2.853	1	0	9.23	71.92	0	36	0	2	17	1	1	1	0.459	0.563
Furanodienone	6506548	230.13	2.44	2.162	2	0	26.3	72.43	0	35	0	2	18	1	2	1	0.654	0.649
Fuscol	10891538	288.25	6.255	3.593	1	1	20.23	94.72	5	53	0	1	16	0	2	2	0.474	0.566
Fuscoside B	56669207	420.29	5.39	2.357	5	3	79.15	121.17	7	70	0	2	24	0	8	2	0.603	0.534
Galangin	5281616	270.05	2.2	-0.117	5	3	86.99	80.23	1	30	0	3	21	2	8	1	0.757	0.724
Galangin_5-methylether	5488105	284.07	2.521	-0.053	5	2	75.99	85.27	2	33	0	3	21	2	7	1	0.882	0.869
Galbanic acid	7082474	398.21	4.344	2.446	5	1	72.83	116.12	6	59	1	3	25	1	6	3	0.686	0.572
Genkwanin	5281617	284.07	1.459	-0.16	5	2	75.99	85.19	2	33	0	3	21	2	7	1	0.88	0.867
Gibberellic acid	6466	346.14	-0.595	-0.011	6	3	104.06	85.87	1	47	1	5	28	0	9	3	0.575	0.469
Gigantol	3085362	274.12	2.184	0.417	4	2	58.92	85.7	5	38	0	2	16	2	6	0	0.924	0.91
Girinimbine	96943	263.13	3.081	1.813	2	1	21.26	89.52	0	37	0	4	23	3	3	0	0.635	0.679
Glabrachromene I	15719487	380.13	3.351	0.52	6	1	74.22	113.25	4	48	0	4	27	2	7	2	0.846	0.813
Glaucine	16754	355.18	1.757	0.229	5	0	40.16	108.41	4	51	0	4	25	2	5	0	0.879	0.892
Gleinene	15609901	274.12	3.427	0.879	4	0	44.76	82.25	4	38	0	2	17	1	4	2	0.818	0.754
Gliotoxin	6223	326.04	-2.142	-0.153	6	2	131.68	81.69	1	35	0	4	23	0	8	2	0.662	0.688
Glycycoumarin	5317756	368.13	3.001	1.644	6	3	96.22	109.29	4	47	0	3	25	2	9	3	0.658	0.568
Gnaphaliin_B	5491798	314.08	2.761	-0.552	6	2	85.22	91.91	3	37	0	3	22	2	8	1	0.868	0.891
Goniothalamin	6440856	200.08	2.859	2.151	2	0	26.3	64.44	2	27	0	2	14	1	2	2	0.641	0.61
Goreishic acid	3081756	470.34	7.98	1.848	4	3	77.76	136.43	1	80	1	5	37	0	7	0	0.641	0.587
Grayanotoxin XVIII	44559345	336.23	1.983	-0.016	4	4	80.92	90.45	0	56	0	4	27	0	8	1	0.617	0.559
Gummosin	7092581	382.21	4.11	1.557	4	1	55.76	112.34	3	58	0	4	28	1	5	3	0.774	0.645
Gymnopusin	14505894	300.1	1.97	-0.13	5	2	68.15	90.49	3	38	0	3	21	3	7	1	0.775	0.769
Harmine	5280953	212.09	1.169	-1.037	3	1	33.62	69.05	1	28	0	3	17	3	4	0	0.649	0.64
Hautriwaic Acid	12310372	332.2	4.029	-0.013	4	2	66.76	94.12	5	52	1	3	21	1	6	0	0.927	0.921
Hematein	135403802	300.06	0.38	-1.049	6	4	107.22	82.4	0	34	0	4	25	1	10	2	0.55	0.506
Herbarumin_I	10751829	228.14	1.726	-1.217	4	2	66.76	55.57	2	36	0	1	14	0	6	3	0.62	0.504
Herbarumin_III	643678	212.14	2.327	-0.995	3	1	46.53	52.52	2	35	0	1	13	0	4	3	0.628	0.51
Herniarin	10748	176.05	1.051	0.532	3	0	35.53	52.24	1	21	0	2	13	1	3	2	0.651	0.567
Hesperetin	72281	302.08	1.03	-0.653	6	3	96.22	85.17	2	36	0	3	22	2	9	0	0.773	0.795
Hinokitiol	3611	164.08	2.349	0.847	2	1	37.3	50.88	1	24	0	1	11	0	3	1	0.665	0.621
Hofmeisterin	11148458	208.07	1.265	0.544	4	1	63.6	57.25	4	27	0	1	11	1	5	3	0.719	0.582
Hofmeisterin_II	14107494	298.12	2.574	1.724	4	2	74.6	91.04	5	40	0	2	18	2	6	1	0.908	0.888
Honokiol	72303	266.13	3.72	2.956	2	2	40.46	90.05	5	38	0	2	16	2	4	1	0.745	0.755
Incensole Acetate	53386731	348.27	5.316	2.651	3	0	35.53	101.4	3	61	0	2	23	0	3	3	0.623	0.532
Indole-3-carbinol	3712	147.07	0.996	-0.357	2	2	32.26	47.98	1	20	0	2	11	2	4	0	0.659	0.633
Indole-3-carboxaldehyde	10256	145.05	1.466	-0.101	2	1	29.1	47	1	18	0	2	11	2	3	1	0.658	0.63
Isobavachalcone	5281255	324.14	3.292	2.505	4	3	77.76	103.51	5	44	0	2	20	2	7	3	0.662	0.545
Isocordoin	6251270	308.14	4.428	3.068	3	2	57.53	101.91	5	43	0	2	19	2	5	3	0.665	0.557
Isocyperol	14076604	220.18	4.16	1.145	1	1	20.23	65.98	1	40	0	2	16	0	2	1	0.589	0.697
Isoespintanol	44423029	210.13	2.545	0.667	3	1	38.69	63.18	3	33	0	1	12	1	4	0	0.85	0.835
Isoglabrachromene	42608067	380.13	2.764	0.106	6	0	63.22	110.3	2	48	0	5	30	2	6	0	0.84	0.844
Isoimperatorin	68081	270.09	2.538	1.148	4	0	44.76	80.65	3	34	0	3	19	2	4	3	0.735	0.61
Isoliquiritigenin	638278	256.07	1.669	0.824	4	3	77.76	79.88	3	31	0	2	17	2	7	2	0.768	0.691
Isoparvifuran	617473	254.09	3.122	1.018	3	1	38.69	82.83	2	33	0	3	19	3	4	0	0.767	0.77
Isopetasol	11746594	234.16	1.35	1.388	2	1	37.3	68.25	0	39	0	2	18	0	3	1	0.704	0.686
Isoquercetin	5280804	464.1	0.099	-3.334	12	8	206.6	116.14	4	53	0	4	32	2	20	2	0.144	0.216
Isorhamnetin	5281654	316.06	1.726	-1.179	7	4	116.45	88.48	2	35	0	3	23	2	11	1	0.602	0.634
Isosclerone	13369486	178.06	-0.245	-0.579	3	2	57.53	48.89	0	23	0	2	14	1	5	0	0.701	0.635
Isoscopoletin	69894	192.04	0.97	-0.031	4	1	55.76	53.85	1	22	0	2	14	1	5	2	0.73	0.638
Jaceosidin	5379096	330.07	1.618	-1.221	7	3	105.45	93.44	3	38	0	3	23	2	10	1	0.705	0.755
Juglone	3806	174.03	-0.011	0.176	3	1	54.37	50.98	0	19	0	2	14	1	4	0	0.728	0.662
Kaempferide	5281666	300.06	1.807	-0.616	6	3	96.22	86.87	2	34	0	3	22	2	9	1	0.759	0.766
Kaempferitrin	5486199	578.16	-0.149	-3.862	14	8	225.06	144.48	5	71	0	5	40	2	22	1	0.759	0.766
Kaempferol	5280863	286.05	1.486	-0.681	6	4	107.22	81.83	1	31	0	3	22	2	10	1	0.629	0.618
Kellerin	40580807	442.24	4.228	1.039	6	1	82.06	121.98	5	66	0	4	30	1	7	3	0.682	0.576
Kobusin	182278	370.14	1.885	-0.776	6	0	55.38	103.95	4	49	0	5	27	2	6	0	0.84	0.855
Labdane F2	3080960	290.26	7.48	2.601	1	1	20.23	89.64	4	55	0	2	18	0	2	1	0.626	0.78
Lanceolatin B	10978265	262.06	2.3	0.615	3	0	35.53	84.62	1	30	0	4	22	3	3	1	0.682	0.661
Lasiodiplodin	14562696	292.17	4.293	-1.805	4	1	55.76	74.69	1	45	0	2	21	1	5	2	0.736	0.679
LDD	721165	233.14	1.743	-1.054	3	0	29.54	64.89	3	36	0	2	15	1	3	0	0.763	0.77
Lecanorin	643441	274.08	2.325	1.277	5	3	86.99	79.69	3	34	0	2	18	2	8	2	0.764	0.706
Levistolide A	70698035	380.2	5.343	-0.101	4	0	52.6	105.96	4	56	0	5	28	0	4	3	0.679	0.56
Lichexanthone	5358904	286.08	1.9	-0.01	5	1	64.99	84.27	2	35	0	3	21	2	6	0	0.931	0.935
Licochalcone A	5318998	338.15	3.733	2.314	4	2	66.76	107.47	6	47	0	2	20	2	6	3	0.729	0.605
Licochalcone B	5318999	286.08	1.698	0.325	5	3	86.99	86.52	4	35	0	2	18	2	8	3	0.692	0.579
Limonene	22311	136.13	3.729	2.142	0	0	0	46.02	1	26	0	1	9	0	0	1	0.328	0.488
Liquiritigenin	114829	256.07	0.871	0.409	4	2	66.76	76.92	1	31	0	3	20	2	6	0	0.865	0.835
Lonchocarpine	6283743	306.13	3.97	2.215	3	1	46.53	100.48	3	41	0	3	22	2	4	2	0.868	0.815
Lovastatin	53232	404.26	4.574	-0.099	5	1	72.83	105.65	7	65	0	3	24	0	6	2	0.727	0.664
Lupeol	259846	426.39	11.901	3.231	1	1	20.23	130.04	1	81	0	5	34	0	2	1	0.486	0.584
Lusianthridin	442702	242.09	1.698	0.524	3	2	49.69	76.62	1	32	0	3	19	2	5	0	0.849	0.815
Luteolin	5280445	286.05	1.486	-0.787	6	4	107.22	81.76	1	31	0	3	22	2	10	2	0.591	0.551
Magnoflorine	73337	342.17	0.924	-1.255	4	2	58.92	101.13	2	49	0	4	26	2	6	1	0.853	0.832
Magnolol	72300	266.13	4.142	2.956	2	2	40.46	90.05	5	38	0	2	16	2	4	1	0.745	0.755
Magnosalin	10454589	416.22	4.568	-0.571	6	0	55.38	123.96	8	62	0	3	24	2	6	0	0.731	0.707
Malbrancheamide	11553183	403.12	2.249	0.966	4	2	44.37	108.77	0	50	0	6	32	2	6	0	0.803	0.767
Malbrancheamide_B	145712532	370.17	1.513	-0.859	3	3	45.57	101.16	0	51	0	6	31	2	6	0	0.732	0.689
Malvidin	159287	331.08	2.099	-1.054	6	4	99.38	92.73	3	39	0	3	23	3	10	1	0.567	0.565
Maslinic Acid	73659	472.36	8.24	1.907	4	3	77.76	137.08	1	82	1	5	37	0	7	1	0.625	0.562
Masticadienonic_acid	5951616	454.34	8.893	3.558	3	1	54.37	135.74	5	79	1	4	31	0	4	2	0.503	0.555
Maxima flavanone A	101673958	374.19	4.373	3.482	3	0	35.53	121.16	3	54	0	4	28	2	3	1	0.658	0.66
Methyl angolensate	419676	470.23	1.892	0.791	7	0	88.13	123.18	4	68	0	5	34	1	7	3	0.593	0.509
Methyl_haematommate	591773	210.05	1.801	0.151	5	2	83.83	54.29	3	25	0	1	12	1	7	3	0.68	0.56
Methyl_orsellinate	76658	182.06	1.329	0.539	4	2	66.76	49.22	2	23	0	1	11	1	6	2	0.729	0.635
Methylarbutin	80131	286.11	-0.331	-1.749	7	4	108.61	71.9	4	38	0	2	17	1	11	0	0.584	0.622
Methylgomisin O	46192500	430.2	4.052	-0.681	7	0	64.61	122.27	5	61	0	4	29	2	7	0	0.749	0.767
Moracin C	155248	310.12	3.147	1.828	4	3	69.92	98.52	3	41	0	3	22	3	7	1	0.714	0.686
Moringin	153557	311.08	0.881	-0.895	6	3	123.6	82.62	4	38	0	2	18	1	9	2	0.676	0.686
Murpanicin	188750	304.13	1.1	1.128	5	1	64.99	86.42	6	42	0	2	17	1	6	3	0.766	0.645
Murrangatin diacetate	389004	304.13	1.1	1.128	5	1	64.99	86.42	6	42	0	2	17	1	6	3	0.766	0.645
Myristicin	4276	192.08	2.711	0.542	3	0	27.69	57.41	3	26	0	2	12	1	3	1	0.728	0.708
N-Cis-feruloyltyramine	6440659	313.13	1.106	0.784	5	3	78.79	96.17	7	42	0	2	17	2	8	1	0.784	0.749
Neoadenostylone	6442373	328.17	3.467	2.202	4	0	52.6	93.92	3	48	0	3	23	1	4	3	0.726	0.605
Neurolenin A	71306326	364.19	2.661	0.967	6	1	89.9	93.55	4	54	0	2	23	0	7	3	0.7	0.618
Neurolenin B	49799795	422.19	2.371	0.579	8	1	116.2	104.22	6	60	0	2	25	0	9	3	0.551	0.534
Neurolenin C	71306329	380.18	1.631	0.2	7	2	110.13	95.07	4	55	0	2	24	0	9	3	0.662	0.58
Neurolenin D	71306328	380.18	2.06	0.2	7	2	110.13	95.07	4	55	0	2	24	0	9	3	0.662	0.58
Nidemone	21574988	258.09	0.784	-0.426	4	1	63.6	74.6	1	33	0	3	20	1	5	1	0.851	0.812
N-Transferuloyl tyramine	5280537	313.13	1.106	0.784	5	3	78.79	96.17	7	42	0	2	17	2	8	1	0.784	0.749
Obovatol	100771	282.13	4.715	2.299	3	2	49.69	92.76	6	39	0	2	16	2	5	2	0.805	0.737
Oleanolic acid	10494	456.36	9.052	2.13	3	2	57.53	134.03	1	81	1	5	36	0	5	1	0.701	0.645
Orcinol	10436	124.05	1.046	0.724	2	2	40.46	38.45	0	17	0	1	9	1	4	0	0.618	0.563
Oroxylin A	5320315	284.07	2.092	-0.16	5	2	75.99	85.19	2	33	0	3	21	2	7	1	0.88	0.867
Osthole	10228	244.11	2.674	2.214	3	0	35.53	75.88	3	34	0	2	16	1	3	3	0.667	0.558
Ovalichromene B	10981007	350.12	2.524	0.604	5	0	53.99	103.65	1	44	0	5	29	2	5	0	0.852	0.835
Ovaliflavanone C	42607824	352.13	2.982	1.458	5	1	64.99	105.08	3	46	0	4	26	2	6	1	0.937	0.931
Ovaliflavanone D	42607825	420.19	4.605	3.14	5	1	64.99	128.72	5	59	0	4	29	2	6	1	0.725	0.709
Oxoglaucine	97662	351.11	1.155	-1.143	6	0	66.35	103.93	4	43	0	4	25	3	6	0	0.706	0.725
Paeonol	11092	166.06	1.199	-0.108	3	1	46.53	48.76	2	22	0	1	10	1	4	1	0.758	0.697
Palmarumycin C11	139587470	334.08	0.822	0.449	5	2	71.45	97.85	0	39	0	6	30	3	7	1	0.704	0.676
Panepoxydone	10130519	210.09	-0.306	0.182	4	2	70.06	54.81	2	29	0	2	14	0	6	2	0.714	0.635
Pedalitin	31161	316.06	2.155	-1.286	7	4	116.45	88.4	2	35	0	3	23	2	11	2	0.563	0.563
Penicillic_acid	1268111	170.06	0.519	0.513	4	1	63.6	43.88	4	22	1	0	7	0	5	2	0.698	0.612
Perezone	92964	248.14	3.377	2.19	3	1	54.37	73.46	4	38	0	1	14	0	4	3	0.692	0.573
Petrosaspongiolide M	17748437	460.28	7.901	1.371	6	1	82.06	120.09	3	73	0	5	34	0	7	2	0.698	0.651
Phaseol	44257530	336.1	2.951	1.658	5	2	75.99	101.31	2	41	0	4	26	3	7	3	0.642	0.545
Phillygenin	3083590	372.16	1.637	-0.641	6	1	66.38	106.07	5	51	0	4	25	2	7	0	0.889	0.914
Phloretin	4788	274.08	1.803	-0.003	5	4	97.99	80.65	4	34	0	2	17	2	9	1	0.703	0.675
Phorbaketal A	44605826	398.25	3.044	3.579	4	1	55.76	119.5	5	63	0	3	26	0	5	1	0.629	0.619
p-hydroxybenzoic_acid	135	138.03	0.268	0.405	3	2	57.53	38.56	1	16	1	1	9	1	5	0	0.699	0.626
p-Hydroxyphenylethanol	10393	138.07	0.037	0.452	2	2	40.46	43.07	2	20	0	1	8	1	4	0	0.691	0.653
Physcion	10639	284.07	0.838	0.318	5	2	83.83	81.86	1	33	0	3	22	2	7	0	0.866	0.863
Piceatannol	667639	244.07	2.185	0.631	4	4	80.92	76.21	2	30	0	2	17	2	8	2	0.655	0.567
Picein	92123	298.11	-0.776	-1.7	7	4	116.45	74.81	4	39	0	2	18	1	11	1	0.571	0.607
Pinnatin	5320607	292.07	2.54	0.117	4	0	44.76	91.27	2	34	0	4	23	3	4	1	0.735	0.716
Pinobanksin	73202	272.07	1.169	-0.243	5	3	86.99	78.26	1	32	0	3	21	2	8	0	0.77	0.751
Pinobanksin_5-methylether	147459	286.08	1.49	-0.179	5	2	75.99	83.3	2	35	0	3	21	2	7	0	0.898	0.901
Pinostrobin	73201	270.09	1.825	0.474	4	1	55.76	81.96	2	34	0	3	20	2	5	0	0.936	0.925
Pinosylvin	5280457	212.08	3.184	1.757	2	2	40.46	73	2	28	0	2	15	2	4	1	0.76	0.78
Piperine	638024	285.14	2.518	-0.635	4	0	38.77	82.03	4	40	0	3	19	1	4	2	0.793	0.743
Pleionesin C	102097659	462.17	2.442	0.011	7	2	94.45	135.35	6	60	0	5	32	3	9	2	0.569	0.548
Plumbagin	10205	188.05	0.17	0.729	3	1	54.37	55.34	0	22	0	2	15	1	4	0	0.751	0.689
Pongachin	155236	336.14	2.99	1.302	4	0	44.76	104.17	2	45	0	4	26	2	4	0	0.889	0.881
Pongachromene	14033985	378.11	3.112	0.142	6	0	63.22	111.99	2	46	0	5	30	2	6	1	0.826	0.816
Pongaflavone	14033983	334.12	3.338	1.339	4	0	44.76	105.87	2	43	0	4	26	2	4	1	0.873	0.849
Ponganone III	15160702	366.15	2.597	0.803	5	0	53.99	110.81	3	49	0	4	27	2	5	0	0.891	0.886
Pongapin	3083586	336.06	2.314	-0.973	6	0	63.22	97.47	2	37	0	5	27	3	6	1	0.692	0.693
Pongapinnol C	12993003	308.07	1.826	-0.34	5	1	64.99	92.95	2	35	0	4	24	3	6	1	0.779	0.774
Postia Secoguaianolide	57392887	262.12	0.146	0.718	4	0	60.44	69.63	4	37	0	2	16	0	4	3	0.684	0.561
Preussochromone_C	57333290	292.06	-0.552	-1.471	7	2	102.29	73.65	2	33	0	3	21	1	9	3	0.618	0.572
Preussomerin C	14845980	396.08	-1.256	-0.951	8	2	106.98	101.74	1	45	0	7	34	2	10	1	0.676	0.752
Prunasin	119033	295.11	-1.157	-1.122	7	4	123.17	74.24	4	38	0	2	18	1	11	0	0.609	0.666
Pseudopterosin A	11732783	432.25	4.368	0.885	6	4	99.38	119.61	3	67	0	4	31	1	10	1	0.634	0.608
Pterostilbene	5281727	256.11	2.69	1.323	3	1	38.69	84.68	4	35	0	2	16	2	4	1	0.904	0.894
Quercitrin	5280459	448.1	0.802	-2.835	11	7	186.37	114.76	3	52	0	4	32	2	18	2	0.187	0.256
Quianhucoumarin_D	10450303	346.11	1.773	0.565	7	0	88.13	89.32	4	43	0	3	23	1	7	3	0.684	0.617
Quinolonimide	11492325	228.05	0.242	-0.32	5	1	66.48	63.81	0	25	0	3	19	1	6	1	0.767	0.719
Radinaphthalenone	139583325	206.06	-0.125	-0.126	4	2	74.6	55.8	0	25	0	2	16	1	6	0	0.744	0.69
Resveratrol	445154	228.08	2.048	1.194	3	3	60.69	74.61	2	29	0	2	16	2	6	1	0.774	0.713
Retusin	5352005	358.11	2.26	-0.986	7	1	83.45	103.59	5	44	0	3	23	2	8	1	0.82	0.871
Rhein	10168	284.03	-0.261	-0.065	6	3	111.9	76.93	1	29	1	3	22	2	9	0	0.731	0.759
Rosmanol	13966122	346.18	3.867	-0.139	5	3	86.99	93.09	1	51	0	4	27	1	8	3	0.646	0.532
Rotenone	6758	394.14	1.867	0.139	6	0	63.22	114.15	3	51	0	5	30	2	6	1	0.828	0.818
Rubrofusarin_B	176918	286.08	1.649	-0.319	5	1	64.99	84.42	2	35	0	3	21	2	6	1	0.906	0.895
Ruscogenin	441893	430.31	4.378	-0.296	4	2	58.92	115.28	0	73	0	6	36	0	6	1	0.702	0.644
Santin	5281695	344.09	1.939	-1.05	7	2	94.45	98.55	4	41	0	3	23	2	9	1	0.799	0.859
Saurolactam	131002	279.09	1.749	0.256	4	1	49.77	86.84	1	34	0	4	23	3	5	1	0.755	0.731
Savinin	5281867	352.09	2.044	0.231	6	0	63.22	99.39	3	42	0	5	27	2	6	3	0.727	0.621
Sclareol	163263	308.27	5.989	1.976	2	2	40.46	90.9	4	58	0	2	19	0	4	1	0.811	0.828
Scoparone	8417	206.06	1.291	0.034	4	0	44.76	58.89	2	25	0	2	14	1	4	2	0.722	0.64
Scopoletin	5280460	192.04	0.97	-0.031	4	1	55.76	53.85	1	22	0	2	14	1	5	2	0.73	0.638
Securinine	442872	217.11	1.018	-0.427	3	0	29.54	55.53	0	31	0	4	19	0	3	2	0.599	0.539
Seravshanin	10317265	374.14	2.319	1.29	7	0	88.13	98.98	5	49	0	3	24	1	7	3	0.663	0.591
Shikonin	479503	288.1	1.154	0.825	5	3	94.83	81.96	3	37	0	2	19	1	8	2	0.757	0.709
Sinomenine	5459308	329.16	0.61	-0.319	5	1	59	95.84	2	47	0	4	25	1	6	1	0.908	0.9
Sporogen_AO-1	177175	248.14	0.021	0.235	3	1	49.83	66.52	1	38	0	3	19	0	4	2	0.751	0.679
Stellarine A	50993701	253.09	0.394	-0.914	5	2	84.55	75.18	2	30	0	3	19	3	7	1	0.697	0.687
Steviol	452967	318.22	3.994	0.883	3	2	57.53	87.66	1	53	1	4	25	0	5	1	0.822	0.789
Suaveolol	11975519	306.26	4.103	0.27	2	2	40.46	89.49	2	56	0	3	22	0	4	1	0.809	0.819
Taiwanin C	363127	348.06	1.995	0.097	6	0	63.22	98.49	1	38	0	6	30	3	6	2	0.654	0.612
Tanshinone I	114917	276.08	2.493	1.54	3	0	43.37	85.57	0	33	0	4	24	3	3	1	0.666	0.628
Tanshinone IIA	164676	294.13	3.247	0.909	3	0	43.37	86.92	0	40	0	4	25	2	3	1	0.798	0.752
Tetramethyl-O-scutellarin	96118	342.11	2.341	-0.529	6	0	63.22	101.91	5	43	0	3	22	2	6	1	0.839	0.838
Thymol	6989	150.1	2.487	1.664	1	1	20.23	49.89	1	25	0	1	10	1	2	0	0.559	0.643
Thymoquinone	10281	164.08	1.102	1.018	2	0	34.14	48.51	1	24	0	1	11	0	2	1	0.609	0.573
Toddalenone	101893838	274.08	1.358	-0.055	5	0	61.83	78.68	4	34	0	2	17	1	5	3	0.725	0.602
Tokinolide B	11090206	380.2	4.778	0.062	4	0	52.6	105.21	4	56	0	5	28	0	4	3	0.681	0.561
Torilin	6450226	376.22	3.188	2.584	5	0	69.67	102.9	6	59	0	2	22	0	5	3	0.606	0.512
Trans-Cinnamaldehyde	637511	132.06	1.968	1.376	1	0	17.07	46.27	2	18	0	1	8	1	1	2	0.481	0.516
Triptolide	107985	360.16	-0.007	-0.887	6	1	84.12	87.16	1	50	0	7	31	0	7	3	0.64	0.554
Tryptanthrin	73549	248.06	0.446	0.658	4	0	49.74	77.11	0	27	0	4	22	2	4	0	0.782	0.736
Umbelliferone	5281426	162.03	0.73	0.468	3	1	46.53	47.2	0	18	0	2	13	1	4	2	0.656	0.554
Ursolic acid	64945	456.36	8.954	1.484	3	2	57.53	132.26	1	81	1	5	36	0	5	1	0.72	0.661
Uvaol	92802	442.38	9.261	1.275	2	2	40.46	132.31	1	82	0	5	35	0	4	1	0.703	0.678
Wogonin	5281703	284.07	2.092	-0.16	5	2	75.99	85.19	2	33	0	3	21	2	7	1	0.88	0.867
Xanthohumol	639665	354.15	3.532	2.007	5	3	86.99	110.16	6	48	0	2	21	2	8	3	0.656	0.544
Xanthorrhizol	93135	218.17	4.414	3.292	1	1	20.23	73.16	4	38	0	1	12	1	2	1	0.536	0.653
Xylarinol_A	42603801	176.05	0.715	0.731	3	1	46.53	51.37	0	21	0	2	14	1	4	2	0.675	0.576
Xylarinol_B	42603802	224.1	-0.419	-1.002	4	3	69.92	60.59	1	32	0	2	16	1	7	0	0.709	0.661
Yangonin	5281575	258.09	2.046	0.969	4	0	44.76	79.52	4	33	0	2	16	1	4	3	0.72	0.595
Z-Guggulsterone	6450278	312.21	4.086	1.287	2	0	34.14	93.34	0	51	0	4	26	0	2	1	0.704	0.697
Ziganein	5316800	254.06	0.598	0.817	4	2	74.6	75.22	0	29	0	3	21	2	6	0	0.818	0.779
Zonarol	332671	314.22	6.864	1.994	2	2	40.46	97.89	2	53	0	3	23	1	4	2	0.803	0.771

## Sheet: NPs assays
names	Uniprot	ID	ID ZINC	Bioassay
Cacospongionolide B	Slc14a1	P97689	ZINC26966472
Carnosol	PNLIP	P16233	ZINC3871891
Chalcone	AMY2	P00690	ZINC38139289
Chrysophanol	ELANE	P08246	ZINC3861630
Comaparvin	ABCG2	Q9UNQ0	ZINC5807483
Dihydrotanshinone I	PTGER2	P43116	ZINC2585546
Dillapiole	POLB	P06746	ZINC57585
Diosmetin	CYP1B1	Q16678	ZINC5733652
Echinatin	PTPN1	P18031	ZINC4252572
Epoxyazadiradione	MIF	P14174	ZINC58576553
Farnesiferol B	Slc14a1	P97689	ZINC29134693
Farnesiferol C	CCR1	P32246	ZINC28107226
Fisetin	GLO1	Q04760	ZINC39111
Flavone	MAOB	P27338	ZINC57674
Friedelin	GPBAR1	Q8TDU6	ZINC4097720
Fuscoside B	Slc14a1	P97689	ZINC72123265
Galbanic acid	Slc14a1	P97689	ZINC4042371
Gibberellic acid	SLC10A2	Q12908	ZINC3860467
Gigantol	CALM3	P0DP25	ZINC25159
Gliotoxin	FNTB	P49356	ZINC3875454
Glycycoumarin	PTPN1	P18031	ZINC15262009
Herniarin	CA7	P43166	ZINC391177
Hesperetin	CYP1B1	Q16678	ZINC39092
Hinokitiol	TYR	P14679	ZINC95911093
Honokiol	CNR2	P34972	ZINC1536
Isoimperatorin	CYP1B1	Q16678	ZINC296185
Jaceosidin	TAS2R31	P59538	ZINC14779854
Juglone	IDO1	P14902	ZINC526257
Kaempferide	MAPK10	P53779	ZINC6411540
Lanceolatin B	Slc14a1	P97689	ZINC28642532
Malvidin	CD38	P28907	ZINC897714
Moracin C	CCR1	P32246	ZINC5158948
Neurolenin B	Slc14a1	P97689	ZINC100090140
Oroxylin A	FLT3	P36888	ZINC5998558
Paeonol	Cacna1c	P22002	ZINC1906
Penicillic_acid	SLC10A2	Q12908	ZINC3874657
p-Hydroxyphenylethanol	ABCB1	P08183	ZINC388198
Physcion	P2RY12	Q9H244	ZINC3978794
Piceatannol	STK33	Q9BYT3	ZINC14036
Pinostrobin	ABCG2	Q9UNQ0	ZINC391894
Plumbagin	MAOA	P21397	ZINC58187
Preussomerin C	CCR1	P32246	ZINC34383300
Quercitrin	PSIP1	O75475	ZINC4175638
Rotenone	PNLIP	P00591	ZINC3860715
Santin	XDH	P47989	ZINC6018466
Scoparone	BACE1	P56817	ZINC2067
Shikonin	MAOA	P21397	ZINC2015152
Taiwanin C	CCR1	P32246	ZINC1619649
Tanshinone I	TOP1	P11387	ZINC2558154
Tanshinone IIA	PLA2G2A	P14555	ZINC1650576
Trans-Cinnamaldehyde	AKR1C2	P52895	ZINC1532777
Triptolide	DCTPP1	Q9H773	ZINC8234271
Ursolic acid	SLC10A2	Q12908	ZINC3978827

## Sheet: Senolytics and NPs similarity
Number of similar NP compared to senolytic compounds														Tanimoto coefficient																											compound
Navitoclax	ABT	Tunicamycin A	Tunicamycin B	Tunicamycin C	Tunicamicyn D	Gingenoside	Timosaponin aIII	Digoxin	Rapamycin	Roxithromicin	Azithromycin		Senolytic	Navitoclax	ABT	Tunicamycin A	Tunicamycin B	Tunicamycin C	Tunicamicyn D	Gingenoside	Timosaponin aIII	Digoxin	Rapamycin	Roxithromicin	Azithromycin
1	1	1	1	1	1	1	1	1	1	1	1		Cacospongionolide B	0.23	0.23	0.24	0.24	0.24	0.24	0.29	0.29	0.39	0.38	0.24	0.24	0.270833
2	2	2	2	2	2	2	2	2	2	2	2		Carnosol
3	3	3	3	3	3	3	3	3	3	3	3		Chalcone																																Selected compounds
4	4	4	4	4	4	4	4	4	4	4	4		Chrysophanol
5	5	5	5	5	5	5	5	5	5	5	5		Comaparvin
6	6	6	6	6	6	6	6	6	6	6	6		Dihydrotanshinone I
7	7	7	7	7	7	7	7	7	7	7	7		Dillapiole
8	8	8	8	8	8	8	8	8	8	8	8		Diosmetin
9	9	9	9	9	9	9	9	9	9	9	9		Echinatin
10	10	10	10	10	10	10	10	10	10	10	10		Epoxyazadiradione
11	11	11	11	11	11	11	11	11	11	11	11		Farnesiferol B
12	12	12	12	12	12	12	12	12	12	12	12		Farnesiferol C
13	13	13	13	13	13	13	13	13	13	13	13		Fisetin
14	14	14	14	14	14	14	14	14	14	14	14		Flavone
15	15	15	15	15	15	15	15	15	15	15	15		Friedelin
16	16	16	16	16	16	16	16	16	16	16	16		Fuscoside B
17	17	17	17	17	17	17	17	17	17	17	17		Galbanic acid
18	18	18	18	18	18	18	18	18	18	18	18		Gibberellic acid
19	19	19	19	19	19	19	19	19	19	19	19		Gigantol
20	20	20	20	20	20	20	20	20	20	20	20		Gliotoxin
21	21	21	21	21	21	21	21	21	21	21	21		Glycycoumarin
22	22	22	22	22	22	22	22	22	22	22	22		Herniarin
23	23	23	23	23	23	23	23	23	23	23	23		Hesperetin
24	24	24	24	24	24	24	24	24	24	24	24		Hinokitiol
25	25	25	25	25	25	25	25	25	25	25	25		Honokiol
26	26	26	26	26	26	26	26	26	26	26	26		Isoimperatorin
27	27	27	27	27	27	27	27	27	27	27	27		Jaceosidin
28	28	28	28	28	28	28	28	28	28	28	28		Juglone
29	29	29	29	29	29	29	29	29	29	29	29		Kaempferide
30	30	30	30	30	30	30	30	30	30	30	30		Lanceolatin B
31	31	31	31	31	31	31	31	31	31	31	31		Malvidin
32	32	32	32	32	32	32	32	32	32	32	32		Moracin C
33	33	33	33	33	33	33	33	33	33	33	33		Neurolenin B
34	34	34	34	34	34	34	34	34	34	34	34		Oroxylin A
35	35	35	35	35	35	35	35	35	35	35	35		Paeonol
36	36	36	36	36	36	36	36	36	36	36	36		Penicillic_acid
37	37	37	37	37	37	37	37	37	37	37	37		p-Hydroxyphenylethanol
38	38	38	38	38	38	38	38	38	38	38	38		Physcion
39	39	39	39	39	39	39	39	39	39	39	39		Piceatannol
40	40	40	40	40	40	40	40	40	40	40	40		Pinostrobin
41	41	41	41	41	41	41	41	41	41	41	41		Plumbagin
42	42	42	42	42	42	42	42	42	42	42	42		Preussomerin C
43	43	43	43	43	43	43	43	43	43	43	43		Quercitrin
44	44	44	44	44	44	44	44	44	44	44	44		Rotenone
45	45	45	45	45	45	45	45	45	45	45	45		Santin
46	46	46	46	46	46	46	46	46	46	46	46		Scoparone
47	47	47	47	47	47	47	47	47	47	47	47		Shikonin
48	48	48	48	48	48	48	48	48	48	48	48		Taiwanin C
49	49	49	49	49	49	49	49	49	49	49	49		Tanshinone I
50	50	50	50	50	50	50	50	50	50	50	50		Tanshinone IIA
51	51	51	51	51	51	51	51	51	51	51	51		Trans-Cinnamaldehyde
52	52	52	52	52	52	52	52	52	52	52	52		Triptolide
53	53	53	53	53	53	53	53	53	53	53	53		Ursolic acid
54	54	54	54	54	54	54	54	54	54	54	54

## Sheet: NPs and targets
Compound	Target	ID	Ki	IC50	Kd	EC50	Duglikeness	Pharmacological activity	Bioassay DOI						NPs
Cacospongionolide B	CTRB1	P17538	28	54	0	0	-7.9984	Inhibitor	DOI:10.1021/jm00150a027						Cacospongionolide B
Cacospongionolide B	Maob	P19643	173	1313	0	0	-7.9984	Inhibitor	DOI: 10.1016/j.bmcl.2011.02.030						Carnosol
Cacospongionolide B	Slc14a1	P97689	0	21	0	0	-7.9984	Inhibitor	DOI: 10.1016/j.chembiol.2013.08.005						Dihydrotanshinone I
Carnosol	PNLIP	P16233	0	5000	0	0	-3.8329	Inhibitor	DOI: 10.7270/Q22R3V7F						Epoxyazadiradione
Dihydrotanshinone I	HIF1A	Q16665	12	786	67	70	-3.1135	Inhibitor	J Nat Prod 70: 1093-7 (2007)						Farnesiferol B
Dihydrotanshinone I	ELAVL1	Q15717	29	21	13	0	-3.1135	Inhibitor	DOI: 10.7270/Q2Q81GKP						Friedelin
Epoxyazadiradione	MIF	P14174	141	343	14	0	-1.093	Inhibitor	DOI: 10.1074/jbc.M112.341321						Fuscoside B
Farnesiferol B	CTRB1	P17538	28	54	0	0	-5.5562	Inhibitor	DOI: 10.1021/jm00152a011						Gibberellic acid
Friedelin	GPBAR1	Q8TDU6	0	34	1114	0	-3.31	Agonist	DOI: 10.1021/jm900872z						Gliotoxin
Friedelin	Nos2	P29477	490	468	0	13	-3.31	Inhibitor	DOI: 10.1016/j.bmc.2008.09.021						Hinokitiol
Fuscoside B	CTRB1	P17538	28	54	0	0	-27.495	Inhibitor	DOI: 10.1021/jm00152a011						Neurolenin B
Fuscoside B	Slc14a1	P97689	0	21	0	0	-27.495	Inhibitor	DOI: 10.1016/j.chembiol.2013.08.005						Penicillic_acid
Fuscoside B	Maob	P19643	173	1303	0	0	-27.495	Inhibitor	DOI: 10.1016/j.bmcl.2011.02.030						Preussomerin C
Gibberellic acid	SLC10A2	Q12908	46	294	0	0	-1.7675	Inhibitor	DOI: 10.1021/jm1003683						Tanshinone I
Gliotoxin	EHMT2	Q96KQ7	7	501	10	1	6.3578	Inhibitor	DOI: 10.1016/j.bmc.2016.09.071						Tanshinone IIA
Gliotoxin	SUV39H1	O43463	11	14	0	0	6.3578	Inhibitor	DOI: 10.1021/jm300917h						Triptolide
Gliotoxin	FNTA	P49354	17	2125	1	107	6.3578	Inhibitor	DOI: 10.1016/0960-894X(96)00372-1						Ursolic acid
Hinokitiol	HDAC2	Q92769	87	1913	81	0	0.86374	Inhibitor	DOI: 10.7270/Q28055HS
Hinokitiol	HDAC8	Q9BY41	109	1923	30	1	0.86374	Inhibitor	DOI: 10.7270/Q2QZ2D3V
Hinokitiol	HDAC5	Q9UQL6	76	321	0	0	0.86374	Inhibitor	DOI: 10.1021/jm2003552
Hinokitiol	HDAC1	Q13547	137	6232	103	45	0.86374	Inhibitor	DOI: 10.7270/Q2M0484T
Hinokitiol	HDAC6	Q9UBN7	101	3852	29	69	0.86374	Inhibitor	DOI: 10.7270/Q24B33S0				Total Number of Molecule Violated the Rule	Total Number of Molecule Passed the Rule	Total Number of Molecule Filter
Hinokitiol	HDAC4	P56524	89	1136	1	19	0.86374	Inhibitor	DOI: 10.7270/Q2QZ2D3V			wQED	220	343	563
Hinokitiol	TYR	P14679	5	129	0	1	0.86374	Inhibitor	DOI: 10.1016/j.bmc.2014.08.027
Neurolenin B	CTRB1	P17538	28	54	0	0	-5.1246	Inhibitor	DOI: 10.1021/jm00152a011
Neurolenin B	Slc14a1	P97689	0	21	0	0	-5.1246	Inhibitor	DOI: 10.1016/j.chembiol.2013.08.005
Neurolenin B	Maob	P19643	173	1303	0	0	-5.1246	Inhibitor	DOI: 10.1016/j.bmcl.2011.02.030
Penicillic acid	SLC10A2	Q12908	46	294	0	0	-12.29	Inhibitor	DOI: 10.1016/j.chembiol.2013.08.005
Preussomerin C	CCR1	P32246	112	942	1	43	1.0509	-	DOI: 10.7270/Q22J69HG
Preussomerin C	CCR2	P41597	272	2646	17	7	1.0509	-	DOI: 10.1016/j.ejmech.2015.01.063
Preussomerin C	CCR3	P51677	425	937	2	5	1.0509	-	DOI: 10.1016/j.bmcl.2012.08.103
Preussomerin C	CCR6	P51684	0	365	0	1	1.0509	-	DOI: 10.7270/Q2M04462
Preussomerin C	CCR7	P32248	0	9	0	1	1.0509	-	DOI: 10.1021/jm801065q
Preussomerin C	CCR8	P51685	76	120	0	40	1.0509	-	DOI: 10.1021/jm061118e
Preussomerin C	CCR9	P51686	218	82	0	1	1.0509	-	DOI: 10.7270/Q28918WJ
Preussomerin C	CXCL10	P02778	0	205	0	0	1.0509	-	DOI: 10.7270/Q29G5KQK
Preussomerin C	JUN	P05412	0	241	1	5	1.0509	Inhibitor	DOI: 10.1016/s0960-894x(00)00312-7
Preussomerin C	FOS	P01100	0	75	0	0	1.0509	Inhibitor	DOI: 10.1016/s0960-894x(00)00312-7
Tanshinone I	TOP1	P11387	1	499	4	169	-3.7055	Inhibitor	DOI: 10.1016/j.bmcl.2004.01.060
Tanshinone I	CA1	P00915	8751	496	358	0	-3.7055	Inhibitor	DOI: 10.1016/j.ejmech.2015.06.022
Tanshinone I	CES1	P23141	421	213	0	0	-3.7055	Inhibitor	DOI: 10.1016/j.bmc.2008.11.008
Tanshinone I	ACHE	P22303	851	5692	201	44	-3.7055	Inhibitor	DOI: 10.1021/ml4002908
Tanshinone I	PTPN6	P29350	17	255	16	14	-3.7055	Inhibitor	DOI: 10.1016/j.bmcl.2009.09.020
Tanshinone I	RAD51	Q06609	6	276	8	2	-3.7055	Inhibitor	DOI: 10.1021/jm1002974
Triptolide	DCTPP1	Q9H773	5	194	0	0	0.61954	-	DOI: 10.1002/cbic.201100007
Triptolide	F2RL1	P55085	3	201	0	149	0.61954	-	DOI: 10.1021/jm400638v
Triptolide	PTGS2	P35354	148	6098	19	1	0.61954	Inhibitor	DOI: 10.1016/j.ejmech.2015.04.044
Ursolic acid	MBOAT4	Q96T53	0	201	0	0	-3.658	-	DOI: 10.7270/Q2VH5R5S

## Sheet: kmeans senolytic leads
Name.Compound	GPCR.ligand	Ion.channel.modulator	Kinase.inhibitor	Nuclear.receptor.ligand	Protease.inhibitor	Enzyme.inhibitor	nviolations	natoms	log.Kp..cm.s.	Lipinski..violations	Ghose..violations	Veber..violations	Egan..violations	Muegge..violations	Bioavailability.Score	Molweight	cLogP	cLogS	H.Acceptors	H.Donors	Total.Surface.Area	Polar.Surface.Area	Druglikeness	Shape.Index	Molecular.Flexibility	Electronegative.Atoms	Rotatable.Bonds	Aromatic.Rings	Aromatic.Atoms	sp3.Atoms	Symmetric.atoms	mean
Navitoclax (ABT-263)	-3.13	-2.06	-2.76	-2.55	-3.01	-3.43	1.93	2.22	0.87	2.06	1.74	2.19	2.77	2.16	-1.71	2.42	3.14	-2.58	0.7	-0.43	2.29	0.74	-1.71	-0.63	0.77	2.02	1.91	1.71	1.95	0.71	3.49	0.444839
ABT-737	-1.22	-2	-1.51	-1.67	-0.77	-1.66	1.93	1.64	1.18	1.16	1.74	2.19	2.77	1.58	-1.71	1.71	1.12	-2.51	0.7	-0.43	1.75	0.66	0.38	0.11	0.68	1.2	1.73	2.44	2.75	0.06	2.08	0.583226
Ginsenoside rb1	-3.62	-3.01	-2.97	-2.8	-4.44	-3.7	1.93	2.99	-3.02	2.06	1.74	2.19	1.06	2.74	-1.71	3.02	-1.31	-0.42	3.19	4.11	2.27	3.53	0.88	-1.49	0.89	3.04	1.91	-1.22	-1.26	3.6	-0.19	0.322258
Tunicamycin C	-1.29	-2.11	-1.75	-1.05	-0.72	-1.51	1.93	1.71	-2.31	2.06	1.74	2.19	1.06	2.16	-1.71	1.72	-1.57	0.12	2.56	2.71	1.7	2.57	-2.6	-0.5	0.88	2.42	2.47	-1.22	-1.26	1.66	-0.47	0.373871	0.3365
Tunicamycin D	-2.03	-2.52	-2.29	-2.35	-1.44	-2.22	1.93	1.9	-1.84	2.06	1.74	2.19	1.06	2.16	-1.71	1.91	-0.094	-0.3	2.56	2.71	1.95	2.57	-2.6	-0.25	0.83	2.42	3.02	-1.22	-1.26	1.85	-0.47	0.331161
Tunicamycin A	-1.53	-2.27	-1.95	-2.04	-0.95	-1.76	1.93	1.77	-2.15	2.06	1.74	2.19	1.06	2.16	-1.71	1.78	-1.36	-0.02	2.56	2.71	1.78	2.57	-2.6	-0.41	0.86	2.42	2.65	-1.22	-1.26	1.72	-0.47	0.330968
Tunicamycin B	-1.77	-2.4	-2.14	-2.2	-1.18	-2	1.93	1.64	-2	2.06	1.74	2.19	1.06	2.16	-1.71	1.85	-1.15	-0.16	2.56	2.71	1.87	2.57	-2.6	-0.33	0.84	2.42	2.84	-1.22	-1.26	1.76	-0.47	0.31
Rapamycin	-2.58	-2.71	-2.74	-2.5	-2.8	-2.78	1.06	2.22	-0.26	1.16	1.74	0.78	1.06	1.58	-1.71	2.15	-1.99	-1.48	1.32	-0.08	2.46	1.07	0.5	-1.99	0.38	1.2	0.06	-1.22	-1.26	1.97	-0.75	-0.198065
Timosaponin A-III	0.44	-1.04	-0.96	-0.55	-0.03	-0.59	1.93	1.39	-0.72	2.06	1.1	0.78	1.06	2.16	-1.71	1.36	-0.39	-0.71	1.12	1.32	1.16	1.09	-0.64	-0.79	0.1	1	0.06	-1.22	-1.26	2.35	-0.75	0.294194
Digoxin	-1.03	-1.66	-1.45	-1.09	-0.61	-1.56	1.93	1.56	-1.61	2.06	1.1	0.78	1.06	2.16	-1.71	1.56	-0.12	-0.94	1.32	0.97	1.36	1.18	0.65	-0.14	0.17	1.2	0.24	-1.22	-1.26	2.29	-0.75	0.207742
Azithromycin	-0.25	-0.84	-0.71	-0.67	0.22	-0.6	1.06	1.39	-0.48	1.16	1.1	0.78	1.06	1	-1.71	1.42	-0.23	0.42	1.32	0.62	1.51	0.87	2.18	-2.48	0.94	1.2	0.24	-1.22	-1.26	2.23	-0.47	0.316129
Roxithromycin	-1.45	-2.08	-1.57	-1.62	-1.03	-1.56	1.06	1.77	-0.95	1.16	1.1	2.19	1.06	1	-1.71	1.51	0.06	-0.26	1.94	0.62	1.94	1.36	1.19	-1.76	0.91	1.51	1.35	-1.22	-1.26	2.45	-0.47	0.233548

## Sheet: NPs and no. of targets
Compound	Target	ID	Number of conected targets
Cacospongionolide B	CTRB1	P17538	3
	Maob	P19643
	Slc14a1	P97689
Carnosol	PNLIP	P16233	1
Dihydrotanshinone I	HIF1A	Q16665	2
	ELAVL1	Q15717
Epoxyazadiradione	MIF	P14174	3
Farnesiferol B	CTRB1	P17538	1
Friedelin	GPBAR1	Q8TDU6	2
	Nos2	P29477
Fuscoside B	CTRB1	P17538	3
	Slc14a1	P97689
	Maob	P19643
Gibberellic acid	SLC10A2	Q12908	1
Gliotoxin	EHMT2	Q96KQ7	3
	SUV39H1	O43463
	FNTA	P49354
Hinokitiol	HDAC2	Q92769	7
	PPO2	O42713
	HDAC8	Q9BY41
	HDAC5	Q9UQL6
	HDAC1	Q13547
	HDAC6	Q9UBN7
	HDAC4	P56524
	TYR	P14679
Neurolenin B	CTRB1	P17538	3
	Slc14a1	P97689
	Maob	P19643
Penicillic acid	SLC10A2	Q12908	1
Preussomerin C	CCR1	P32246	10
	CCR2	P41597
	CCR3	P51677
	CCR6	P51684
	CCR7	P32248
	CCR8	P51685
	CCR9	P51686
	CXCL10	P02778
	JUN	P05412
	FOS	P01100
Tanshinone I	TOP1	P11387	6
	CA1	P00915
	CES1	P23141
	ACHE	P22303
	PTPN6	P29350
	RAD51	Q06609
Tanshinone IIA	PLA2G2A	P14555	2
	GTF2A1	P52655
Triptolide	DCTPP1	Q9H773
	F2RL1	P55085	2
	PTGS2	P35354
Ursolic acid	MBOAT4	Q96T53	1

## Sheet: Senolytics and QED
Name.Compound	MW	logp	Alogp	HBA	HBD	TPSA	AMR	nRB	nAtom	nAcidicGroup	RC	nRigidB	nAromRing	nHB	SAlerts	uwQED	wQED
Dasatinib	487.16	-0.02	-0.371	9	3	130.22	134.28	8	59	0	4	28	3	12	0	0.411	0.479
Navitoclax (ABT-263)	973.3	6.593	5.527	11	2	170.42	269.66	18	120	0	7	53	4	13	2	0.072	0.082
Panobinostat	349.18	1.533	0.742	3	4	73.39	112.46	8	49	0	3	20	3	7	4	0.427	0.289
Geldanamycin	560.27	1.021	0.816	11	3	163.48	148.82	5	80	0	2	36	0	14	4	0.254	0.265
CHEMBL1939379	385.16	0.172	0.352	7	3	134.24	105.62	0	50	0	3	29	2	10	1	0.61	0.661
BIIB021	318.1	-0.044	-0.653	7	1	87.93	84.86	3	37	0	3	21	3	8	1	0.724	0.78
NMS-E973	454.15	2.108	-0.817	6	3	146.76	119.87	7	55	0	4	29	3	9	2	0.453	0.459
HSP90 Inhibitor 7	323.14	0.821	0.922	7	1	92.64	94.93	4	41	0	3	22	2	8	2	0.823	0.842
HSP90 Inhibitor 5	272.96	1.475	1.775	3	1	50.74	69.57	1	22	0	2	16	2	4	1	0.878	0.843
HSP90 Inhibitor 1	315.01	0.659	0.385	5	2	89.12	78.46	1	29	0	3	20	3	7	0	0.743	0.75
HSP90 Inhibitor 3	189.08	0.945	0.463	3	1	38.33	57.38	2	25	0	2	13	1	4	3	0.665	0.538
HSP90 Inhibitor 4	253.02	1.042	1.589	3	1	50.74	69.57	1	25	0	2	16	2	4	0	0.88	0.854
Alvespimicyn	616.35	1.034	0.688	12	4	169.52	168.52	8	92	0	2	37	0	16	3	0.206	0.24
2-Deoxy-D-glucose	164.07	-2.561	-2.138	5	4	97.99	36.01	5	23	0	0	5	0	9	1	0.451	0.411
Metformin	129.1	-0.539	-0.869	5	3	91.49	31.09	2	20	0	0	6	0	8	2	0.52	0.443
Rapamycin	913.56	4.321	-1.147	14	3	195.43	237.14	6	144	0	4	62	0	17	4	0.16	0.19
Tofacitinib	312.17	-0.016	-1.994	7	1	84.09	84.2	4	43	0	3	21	2	8	0	0.762	0.837
Ruxolitinib	306.16	1.819	-2.006	6	1	76.14	84.5	4	41	0	4	22	3	7	0	0.677	0.716
Aspirin	180.04	0.67	0.44	4	1	63.6	48	3	21	1	1	10	1	5	2	0.76	0.669
Allatoin	158.04	-1.169	-1.241	7	4	113.32	28.02	2	17	0	1	9	0	11	1	0.452	0.441
Epigallocatechin gallate	458.08	2.984	-1.612	11	8	197.37	120.95	4	51	0	4	32	3	19	3	0.158	0.197
Tocotrienol	382.29	7.371	5.048	2	1	29.46	126.48	9	66	0	2	20	1	3	1	0.437	0.451
Quercetin	302.04	1.834	-1.244	7	5	127.45	83.44	1	32	0	3	23	2	12	2	0.467	0.458
Piperlongumine	317.13	1.368	-0.601	6	0	65.07	90.16	6	42	0	2	18	1	6	1	0.812	0.807
Naringenin	272.07	0.79	-0.154	5	3	86.99	78.53	1	32	0	3	21	2	8	0	0.772	0.753
Apigenin	270.05	1.138	-0.224	5	3	86.99	80.15	1	30	0	3	21	2	8	1	0.755	0.722
Kaempferol	286.05	1.486	-0.681	6	4	107.22	81.83	1	31	0	3	22	2	10	1	0.629	0.618
Cianidanol	290.08	0.852	-0.936	6	5	110.38	81.07	1	35	0	3	22	2	11	1	0.545	0.524
Genistein	270.05	1.043	-0.387	5	3	86.99	78.92	1	30	0	3	21	2	8	1	0.751	0.719
Resveratrol	228.08	2.048	1.194	3	3	60.69	74.61	2	29	0	2	16	2	6	1	0.774	0.713
Pterostilbene	256.11	2.69	1.323	3	1	38.69	84.68	4	35	0	2	16	2	4	1	0.904	0.894
Ginsenoside rb1	1108.6	2.673	-4.453	23	15	377.29	263.98	16	169	0	8	68	0	38	2	0.042	0.061
Phloroglucinol	126.03	0.573	-0.286	3	3	60.69	35.77	0	15	0	1	9	1	6	0	0.585	0.5
Oleuropein	540.18	-0.072	-1.593	13	6	201.67	131.67	11	70	0	3	29	1	19	5	0.101	0.103
Oleacein	320.13	1.397	0.348	6	2	100.9	87.72	10	43	0	1	13	1	8	5	0.471	0.303
Espermidine	145.16	-0.654	-2.738	3	3	64.07	39.33	7	29	0	0	2	0	6	1	0.442	0.388
Urolithin A	228.04	0.947	0.556	4	2	66.76	67.08	0	25	0	3	19	2	6	2	0.733	0.639
Urolithin B	212.05	1.661	1.119	3	1	46.53	65.48	0	24	0	3	18	2	4	2	0.729	0.636
Urolithin C	244.04	1.295	-0.007	5	3	86.99	68.69	0	26	0	3	20	2	8	3	0.591	0.407
Urolithin D	260.03	1.643	-0.57	6	4	107.22	70.29	0	27	0	3	21	2	10	3	0.496	0.403
Curcumin	368.13	1.945	0.522	6	2	93.06	111.7	8	47	0	2	20	2	8	2	0.739	0.698
ABT-737	812.26	5.425	4.127	8	2	161.81	241.7	17	101	0	6	44	5	10	3	0.085	0.072
A-1331852	658.27	5.377	1.702	9	2	135.26	196.01	8	86	1	9	48	5	11	0	0.244	0.275
A-1155463	669.19	2.746	3.397	9	2	157.43	195.36	11	79	1	6	41	5	11	3	0.131	0.129
Fisetin	286.05	1.915	-0.681	6	4	107.22	81.83	1	31	0	3	22	2	10	2	0.594	0.554
139-08-2	367.3	8.516	0	0	0	0	0	15	67	0	1	9	1	0	2	0.306	0.417
Ganetespib	364.15	3.012	0.242	7	3	88.4	108.68	3	47	0	4	27	3	10	1	0.647	0.673
Onalespib	409.24	1.148	0.851	6	2	67.25	125.21	5	61	0	4	28	2	8	0	0.855	0.86
NVP-AUY922	465.23	2.44	0.672	6	3	103.62	136.67	8	65	0	4	29	3	9	0	0.538	0.521
PU-H71	512.05	2.256	-1.323	8	2	122.13	121.51	7	49	0	4	24	3	10	2	0.427	0.44
NVP-BEP800	479.09	1.598	0.413	7	2	117.61	125.68	8	54	0	4	26	3	9	0	0.539	0.563
Timosaponin A-III	740.43	4.661	-3.153	13	7	196.99	176.34	6	116	0	8	53	0	20	1	0.109	0.156
Dactolisib	469.19	1.359	1.482	6	0	72.06	153.53	3	59	0	6	38	5	6	0	0.436	0.429
Loperamide	476.22	3.777	2.174	4	1	43.78	147.56	8	67	0	4	29	3	5	0	0.616	576
Niguldipine	609.28	6.982	3.845	6	1	111.01	182.15	12	84	0	5	37	3	7	5	0.188	0.113
Fluspirilene	475.24	3.366	1.599	4	1	35.58	140.89	7	66	0	5	32	3	5	1	0.632	0.596
Brefeldin A	280.17	2.363	-0.704	4	2	66.76	72.86	0	44	0	2	21	0	6	3	0.628	0.506
Tunicamycin A	830.42	2.441	-7.525	20	11	306.37	183.4	22	120	0	4	39	0	31	2	0.029	0.037
Tunicamycin B	844.43	3.01	-7.813	20	11	306.37	186.31	23	123	0	4	39	0	31	2	0.026	0.032
Tunicamycin C	816.4	1.872	-7.237	20	11	306.37	180.49	21	117	0	4	39	0	31	2	0.031	0.041
Tunicamycin D	858.45	3.579	-8.101	20	11	306.37	189.22	24	126	0	4	39	0	31	2	0	0
MG-132	475.3	4.996	1.688	8	3	113.6	130.54	18	75	0	1	16	1	11	2	0.325	0.279
Anisomycin	265.13	0.333	-0.33	5	2	67.79	73.73	5	38	0	2	15	1	7	2	0.816	0.757
Cycloheximide	281.16	0.758	-1.105	5	2	83.47	71.29	3	43	0	2	18	0	7	1	0.784	0.785
NVP-BSK805	490.23	0.828	0.19	7	1	64.82	140.12	5	64	0	6	36	4	8	1	0.487	0.485
AG-490	294.1	1.411	0.973	5	3	93.35	90.13	5	36	0	2	18	2	8	3	0.683	0.574
JAK Inhibitor I	309.13	1.527	0.964	4	2	53.49	90.32	1	39	0	4	25	3	6	1	0.752	0.726
TYK2-IN-2	310.15	0.675	-1.197	7	3	95.11	91.17	4	41	0	3	21	3	10	0	0.625	0.674
o-Vanillin	152.05	1.018	-0.046	3	1	46.53	44.28	2	19	0	1	9	1	4	1	0.738	0.673
Fenofibrate	360.11	3.039	2.475	4	0	52.6	105.74	7	46	0	2	19	2	4	3	0.662	0.538
Digoxin	780.43	2.174	-3.678	14	6	203.06	184.46	7	119	0	8	55	0	20	3	0.085	0.109
EF24	347.09	1.82	2.119	2	1	29.1	95.99	2	40	0	3	23	2	3	2	0.793	0.79
ouabain	584.28	-0.808	-4.149	12	8	206.6	136.9	4	85	0	6	42	0	20	3	0.09	0.115
k-strophanthin	710.35	0.724	-3.669	14	6	210.9	167.42	8	104	0	7	48	0	20	4	0.071	0.082
strophanthidin	404.22	1.546	-1.306	6	3	104.06	102.27	2	61	0	5	31	0	9	3	0.53	0.456
diphenyleneiodonium	278.97	1.636	1.522	0	0	0	58.13	0	21	0	3	15	2	0	1	0.438	0.692
Azithromycin	748.51	1.888	-2.527	14	5	180.08	188.57	7	124	0	3	47	0	19	2	0.138	0.188
Roxithromycin	836.52	1.736	-2.635	15	5	216.89	206.95	13	134	0	3	47	0	20	5	0.064	0.064

## Sheet: Senolytic leads
Name.Compound	MW	logp	Alogp	HBA	HBD	TPSA	AMR	nRB	nAtom	nAcidicGroup	RC	nRigidB	nAromRing	nHB	SAlerts	uwQED	wQED
Navitoclax (ABT-263)	973.3	6.593	5.527	11	2	170.42	269.66	18	120	0	7	53	4	13	2	0.072	0.082
Rapamycin	913.56	4.321	-1.147	14	3	195.43	237.14	6	144	0	4	62	0	17	4	0.16	0.19
Ginsenoside rb1	1108.6	2.673	-4.453	23	15	377.29	263.98	16	169	0	8	68	0	38	2	0.042	0.061
ABT-737	812.26	5.425	4.127	8	2	161.81	241.7	17	101	0	6	44	5	10	3	0.085	0.072
Timosaponin A-III	740.43	4.661	-3.153	13	7	196.99	176.34	6	116	0	8	53	0	20	1	0.109	0.156
Tunicamycin A	830.42	2.441	-7.525	20	11	306.37	183.4	22	120	0	4	39	0	31	2	0.029	0.037
Tunicamycin B	844.43	3.01	-7.813	20	11	306.37	186.31	23	123	0	4	39	0	31	2	0.026	0.032
Tunicamycin C	816.4	1.872	-7.237	20	11	306.37	180.49	21	117	0	4	39	0	31	2	0.031	0.041
Tunicamycin D	858.45	3.579	-8.101	20	11	306.37	189.22	24	126	0	4	39	0	31	2	0	0
Digoxin	780.43	2.174	-3.678	14	6	203.06	184.46	7	119	0	8	55	0	20	3	0.085	0.109
Azithromycin	748.51	1.888	-2.527	14	5	180.08	188.57	7	124	0	3	47	0	19	2	0.138	0.188
Roxithromycin	836.52	1.736	-2.635	15	5	216.89	206.95	13	134	0	3	47	0	20	5	0.064	0.064

[truncated: 1 more sheets: Targets of Senescence network]
